# Supplementary material for: Light microscopy of proteins in their ultrastructural context
Source: Nat Commun. 2020 Jul 31;11:3850. doi: 10.1038/s41467-020-17523-8 (PMC7395138; doi:10.1038/s41467-020-17523-8)
Supplement: Supplementary file 1 — Supplementary Information [file 41467_2020_17523_MOESM1_ESM.pdf]

# Supplementary Information

Light microscopy of proteins in their ultrastructural context

M'Saad and Bewersdorf

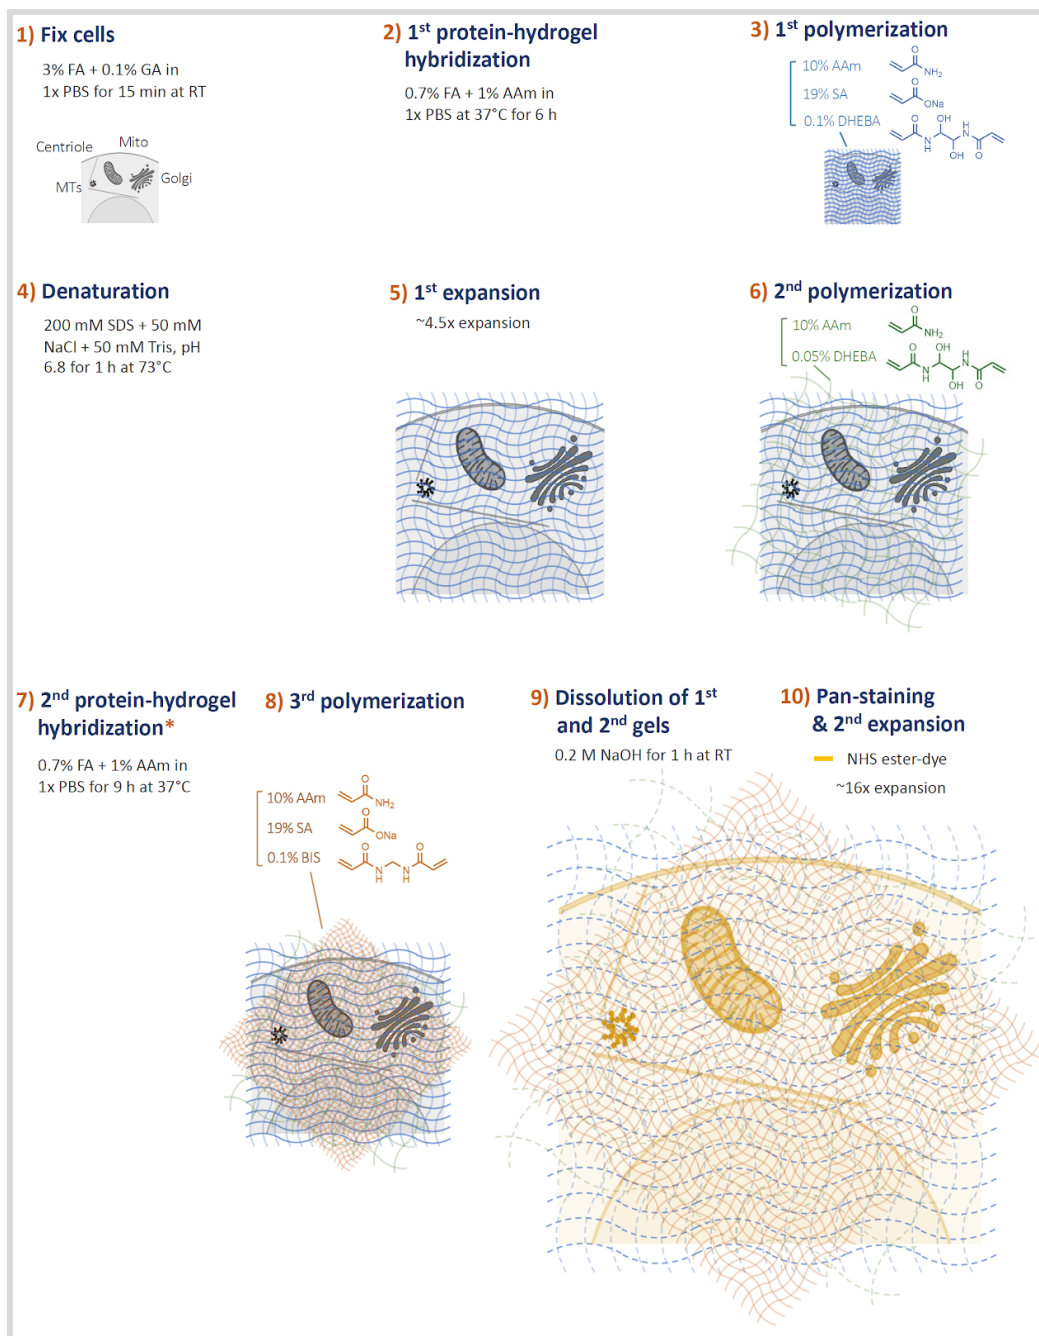

**Supplementary Figure 1. Protocol schematic of pan-ExM.** abbreviations: FA: formaldehyde; GA: glutaraldehyde; AAm: acrylamide; SA: sodium acrylate; DHEBA: N,N'-(1,2-dihydroxyethylene)bis-acrylamide; BIS: N,N'-methylenebisacrylamide; SDS: sodium dodecyl sulfate. Note that all percent concentrations are mass per volume. Step 7, denoted by the orange asterisk, when omitted, does not significantly impact centriole roundedness and length-to-width diameter (pan-ExM modified protocol; see Methods and Supplementary Figure 15) and shows typical NHS ester pan-staining (Supplementary Figure 19). Clipart created with [Biorender.com](https://biorender.com).

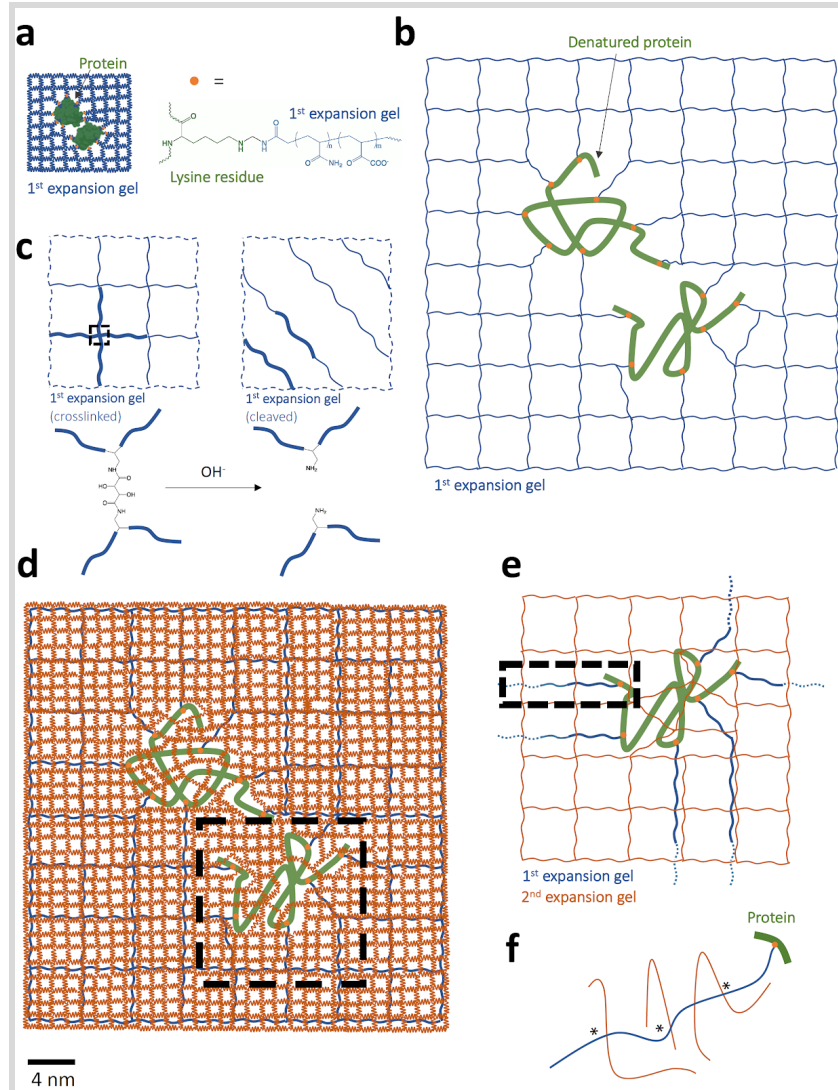

**Supplementary Figure 2. Proposed pan-ExM expansion mechanism.** **a**, schematic of two proteins (green) embedded in a first expansion gel (blue) before sample denaturation and expansion. Orange dot represents the chemical structure of protein-polymer crosslinks. **b**, schematic of proteins denatured (green) and expanded in the first expansion hydrogel (blue). **c**, schematic representing dissolution of the first expansion hydrogel: base hydrolysis of *N,N'*-(1,2-dihydroxyethylene)bisacrylamide (DHEBA) converts the crosslinked first expansion hydrogel network (black dashed box) into linear polymer chains. **d**, schematic of proteins (green) embedded in the second expansion gel (orange) after the first expansion and before the second expansion. The neutral polyacrylamide gel, in which the sample is additionally embedded, is not drawn for simplicity. **e**, schematic of a protein-polymer hybrid after the second expansion, shown in the black dashed box in **d** before the second expansion, entangled in the second expansion gel (orange) after dissolution of the first expansion gel (blue). **f**, schematic of the polymer network shown in the dashed black box in **e** illustrating the definition of polymer entanglement: a polymer chain is likely entangled if it crosses an arbitrary plane 3 times (asterisks). Clipart in **a** created with [Biorender.com](https://www.biorender.com).

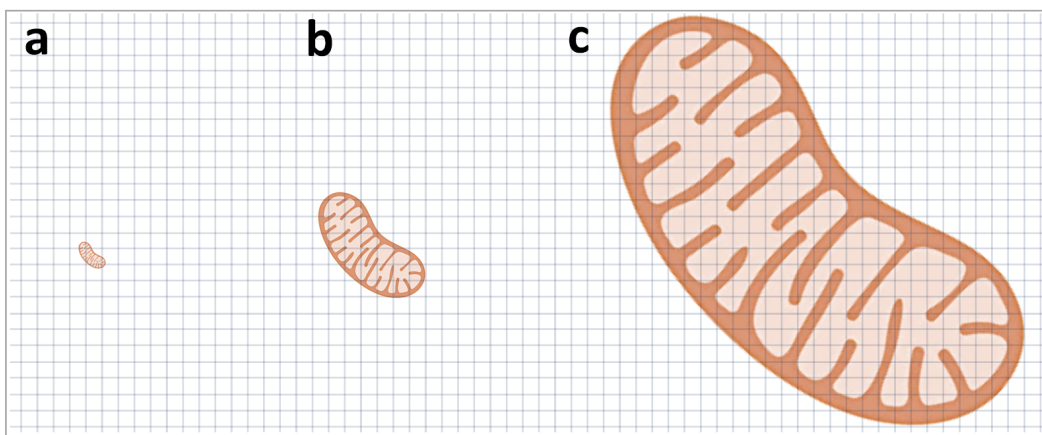

**Supplementary Figure 3. 16-fold iterative expansion drawn to scale. a**, schematic of a mitochondrion before sample expansion. **b**, schematic of a mitochondrion after 4-fold expansion. **c**, schematic of a mitochondrion after 16-fold expansion. Clipart created with [Biorender.com](https://biorender.com).

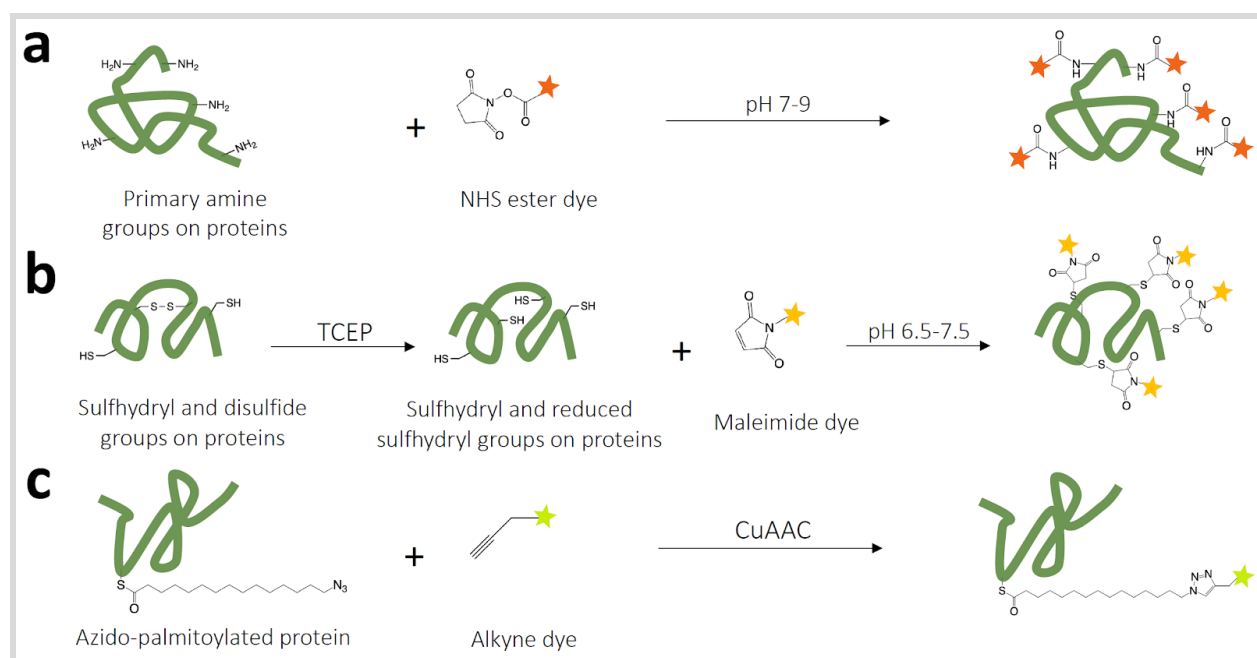

**Supplementary Figure 4. Examples of pan-stains. a**, reaction of primary amines ( $-\text{NH}_2$ ) on proteins (green) using N-Hydroxysuccinimide (NHS) ester-conjugated dyes (orange star) yields proteins with stable protein-dye amide linkages. **b**, reaction of sulfhydryl groups ( $-\text{SH}$ ) on proteins (green) using maleimide-conjugated dyes (yellow star) after sample reduction with tris(2-carboxyethyl)phosphine (TCEP) yields proteins with stable protein-dye thioether linkages. **c**, copper-catalyzed azide/alkyne cycloaddition (CuAAC) reaction of azido palmitoylated proteins (green) with alkyne-conjugated dyes (green star) yields proteins with stable triazole linkages.

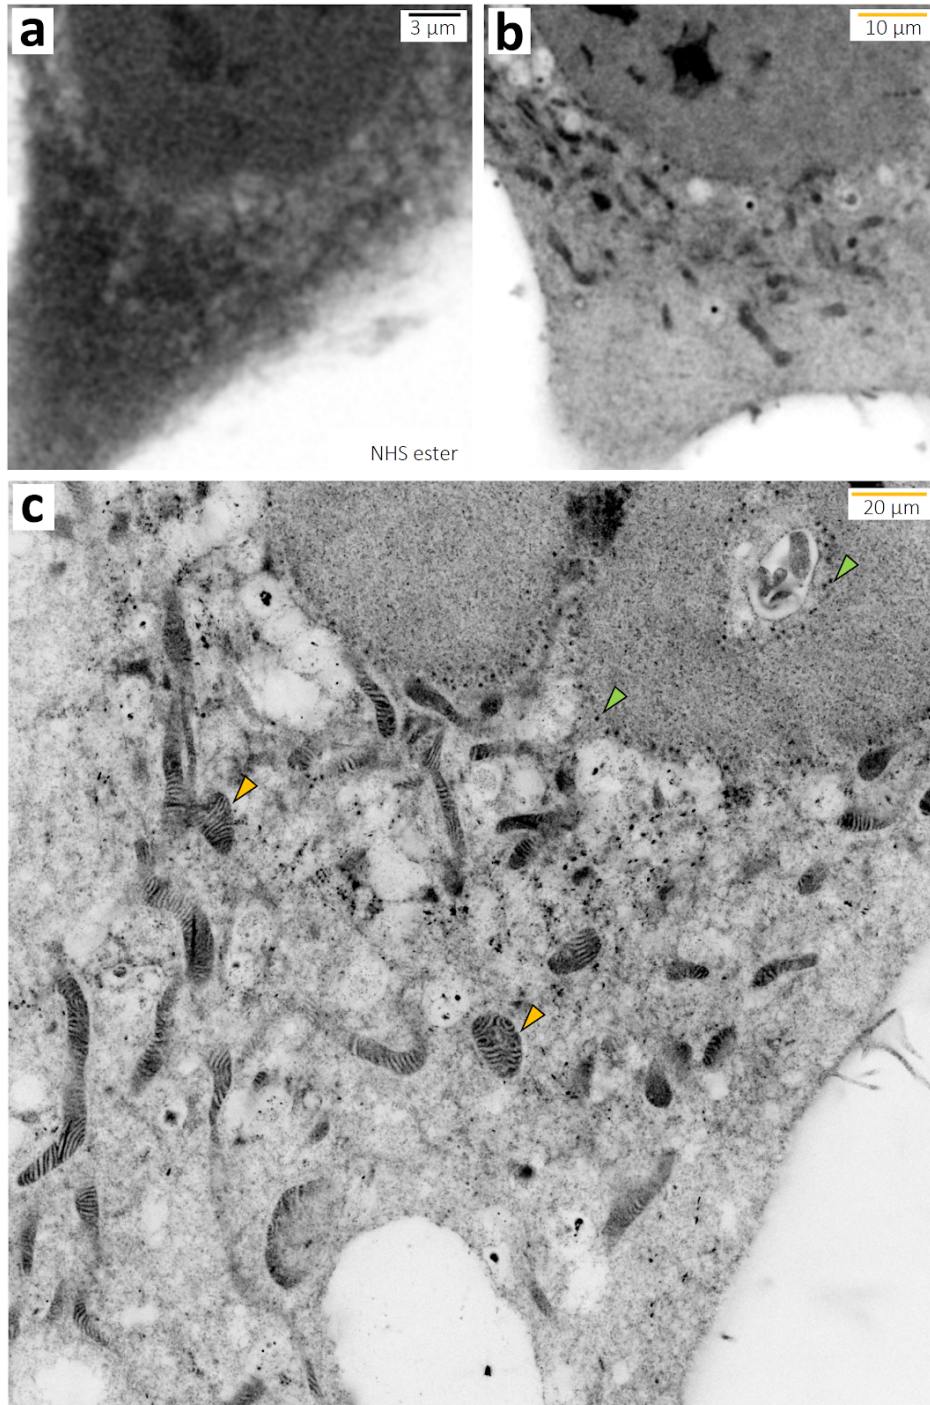

**Supplementary Figure 5. pan-ExM image of a HeLa cell pan-stained with NHS ester and displayed with an inverted color table resembling EM images. a, non-expanded HeLa cell. b, HeLa cell expanded once. c, pan-ExM expanded HeLa cell revealing hallmark ultrastructural features such as mitochondria cristae (yellow arrowheads) and nuclear pore complexes (NPCs) (green arrowheads). Representative images from 3 (a,b) and 11 (c) independent experiments. All figures are displayed with a white-to-black color table. Yellow scale bars are not corrected for the respective expansion factor.**

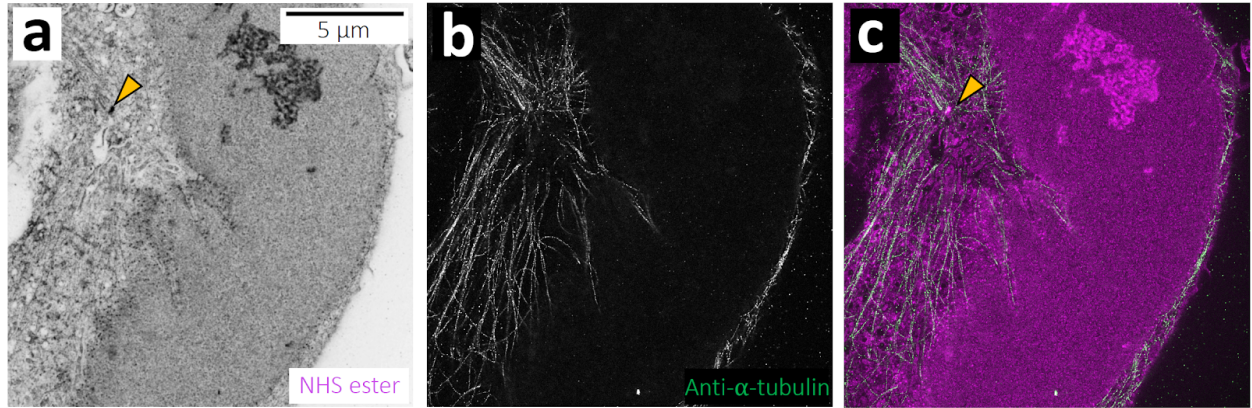

**Supplementary Figure 6. pan-ExM is compatible with microtubule labeling.** **a**, NHS ester pan-stained HeLa cell. The yellow arrowhead points at an amine-rich region corresponding to the centrosome. **b**, same area as in **a**, showing anti- $\alpha$ -tubulin immunostaining. **c**, overlay of **a** and **b**. The yellow arrowhead points at the centrosome. Representative images from 3 (**a-c**) independent experiments. Panel **a** is displayed with a white-to-black color table. Panel **b** is displayed with a black-to-white color table. The scale bar is corrected for the determined expansion factor.

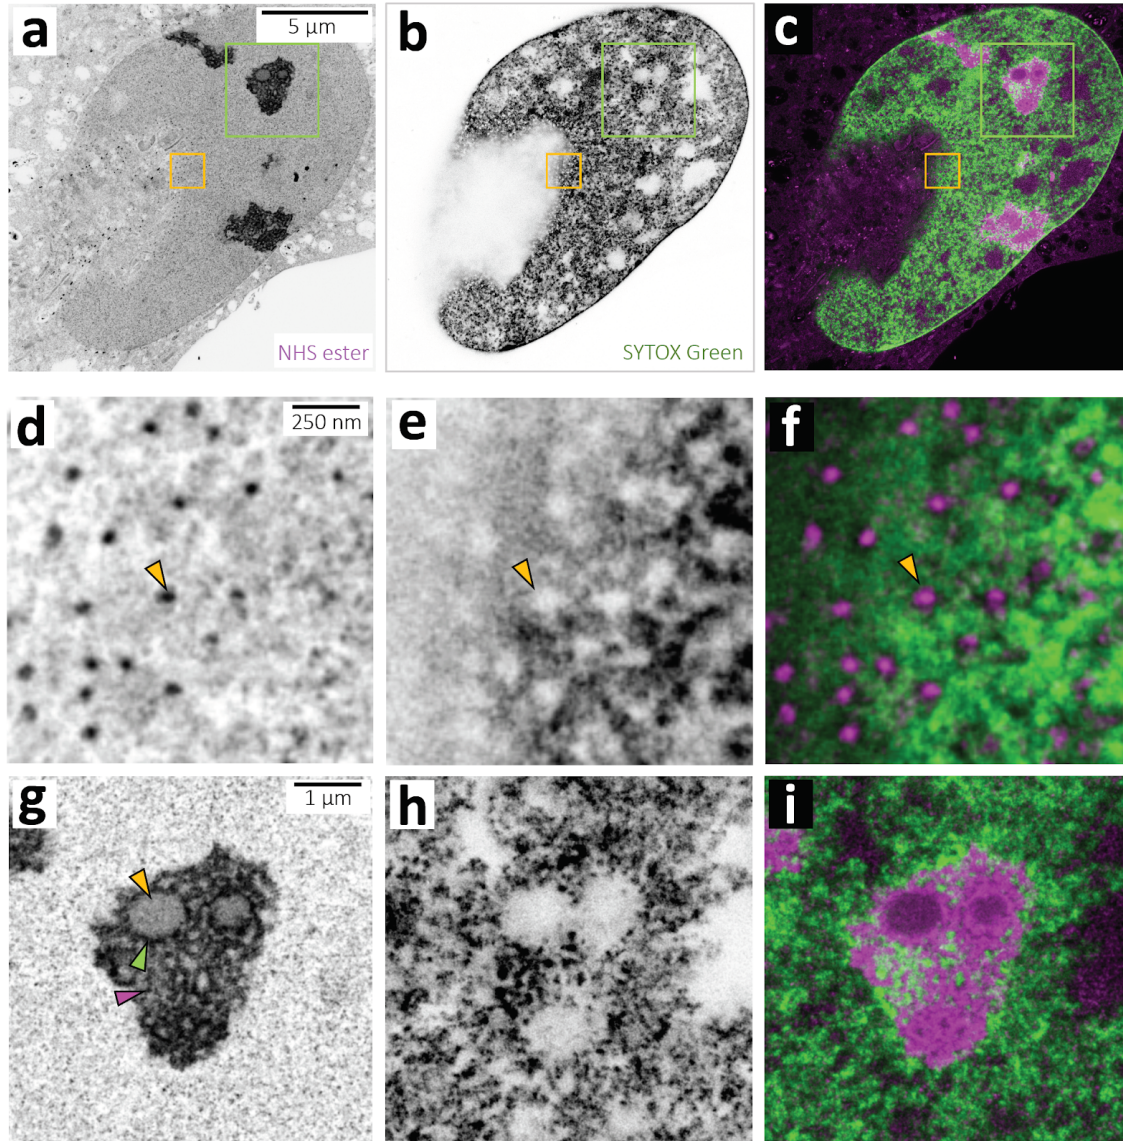

**Supplementary Figure 7. pan-ExM reveals nuclear architecture in a U-2OS cell in interphase.** *a*, NHS ester pan-stained U-2OS cell in interphase. *b*, SYTOX Green nucleic acid stain corresponding to area shown in *a*. *c*, overlay of *a* and *b*. *d*, magnified area in the yellow box in *a* showing amine-rich region corresponding to nuclear pore complexes (NPCs). The yellow arrowhead points at one NPC. *e*, magnified area in the yellow box in *b* showing chromatin and circular regions excluding chromatin which correspond to the areas occupied by NPCs in *d*. The yellow arrowhead points at one such region. *f*, overlay of *d* and *e*. *g*, magnified area in the green box in *a* showing ultrastructural details of a nucleolus. The yellow arrowhead points at the fibrillar center (FC). The green arrowhead points at the dense fibrillar component (DFC). The magenta arrowhead points at the granular component (GC). *h*, magnified area in the green box in *b* showing chromatin and regions excluding chromatin which correspond to the area occupied by the nucleolus in *g*. *i*, overlay of *g* and *h*. Representative images from 5 (*a-i*) independent experiments. Panels *a, b, d, e, g, h* are displayed with a white-to-black color table. All scale bars are corrected for the determined expansion factor.

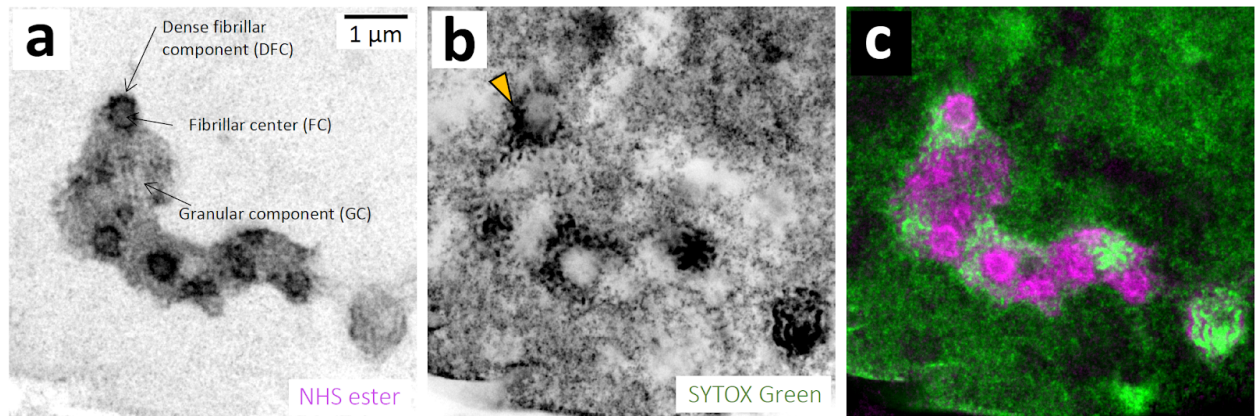

**Supplementary Figure 8. pan-ExM reveals nucleoli ultrastructure in HeLa cells.** *a*, NHS ester rich area in a HeLa cell nucleus representing a nucleolus. Annotations point at the dense fibrillar component (DFC), fibrillar center (FC), and granular component (GC). *b*, SYTOX Green DNA stain corresponding to the same field of view shown in *a*. The yellow arrowhead points at a nucleic acid-rich region surrounding a dense fibrillar center (DFC). *c*, overlay of *a* and *b*. Representative images from at least 3 independent experiments. Panels *a* and *b* are displayed with a white-to-black color table. The scale bar is corrected for the determined expansion factor.

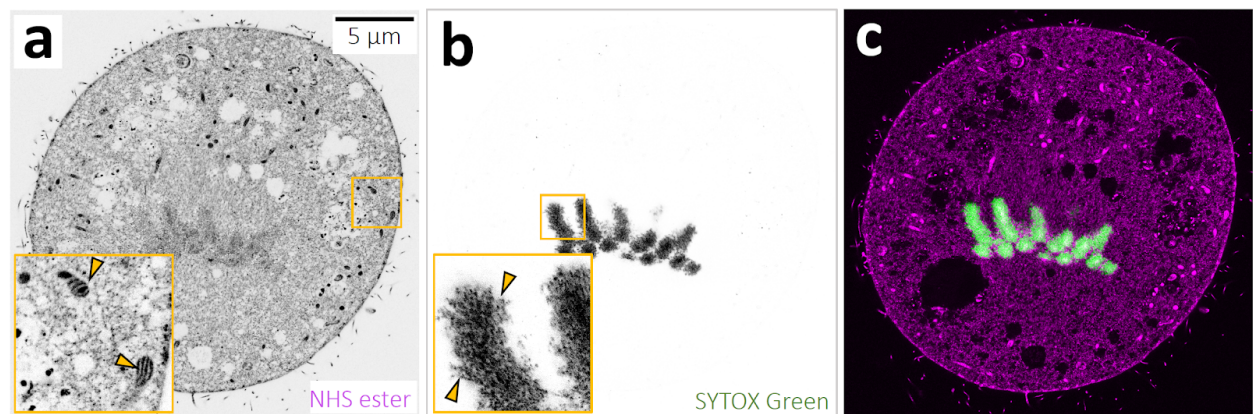

**Supplementary Figure 9. pan-ExM reveals mitotic HeLa cell ultrastructure.** *a*, NHS ester pan-stained mitotic HeLa cell. The inset shows the zoomed-in yellow box and reveals densely labeled mitochondria (yellow arrowheads). *b*, SYTOX Green stain corresponding to the field of view shown in *a* showing chromosomes. The inset shows the zoomed-in yellow box and reveals the polymer brush-like architecture model of mitotic chromosomes (yellow arrowheads). *c*, overlay of *a* and *b*. Representative images from at least 3 (*a-c*) independent experiments. Panel *a* is corrected for crosstalk (see Methods for details). Panels *a* and *b* are displayed with a white-to-black color table. The scale bar is corrected for the determined expansion factor.

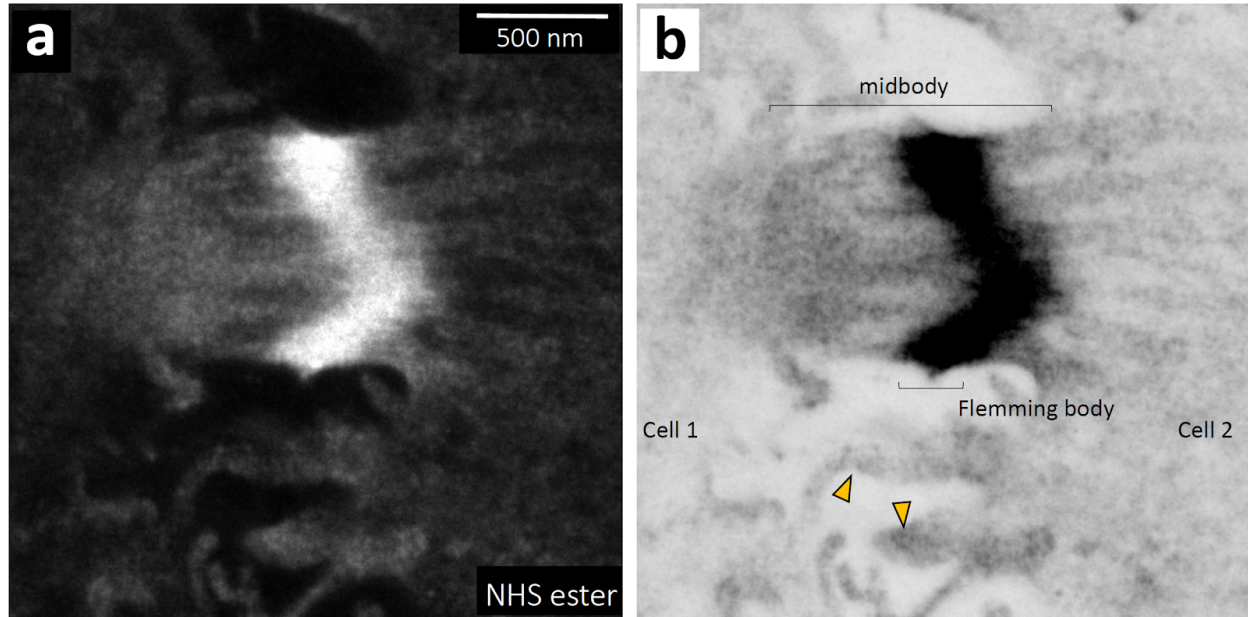

**Supplementary Figure 10. *pan-ExM* reveals cleavage furrow ultrastructure in a dividing U-2OS cell.** *a*, NHS ester pan-stained cleavage furrow. *b*, annotated image in *a* with inverted color table depicting the midbody and amine-rich Flemming body. The yellow arrowheads point at protrusions of the plasma membrane. Representative image from 1 (*a,b*) independent experiment. Panel *a* is displayed with a black-to-white color table. Panel *b* is displayed with a white-to-black color table. The scale bar is corrected for the determined expansion factor. The shown images were recorded with a standard confocal microscope.

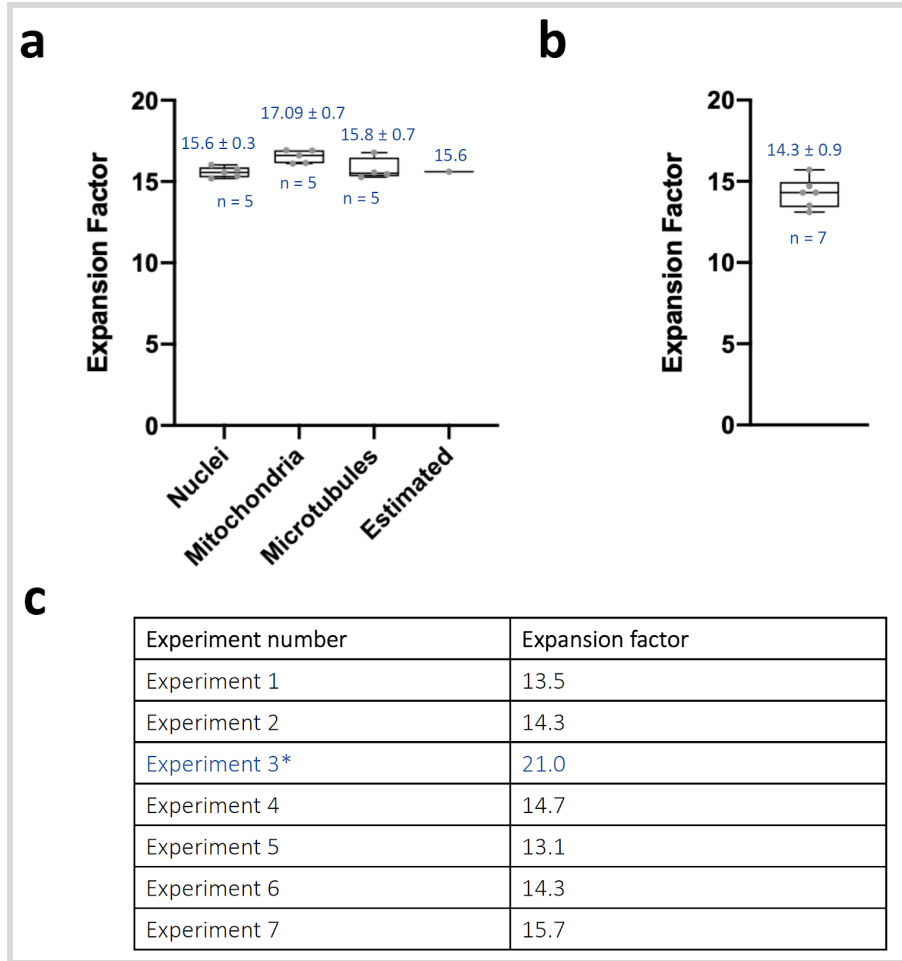

**Supplementary Figure 11. pan-ExM expansion factor calculation across different structures.** **a**, Expansion factor determined from registering pre-expansion to post-expansion images of nuclei, mitochondria, and microtubules (Nuclei:  $n = 5$  cells; Mitochondria:  $n = 5$  cells; Microtubules:  $n = 5$  cells,  $N = 1$  experiment). The figure also shows the estimated expansion factor determined from averaged nuclei cross-section measurements in the same experiment ( $n = 39$  nuclei;  $N = 1$  experiment; see Methods for quantification details). **b**, average expansion factor achieved with pan-ExM ( $n = 6$  experiments). **c**, table showing expansion factors calculated from averaged nuclei cross-section measurements from 7 independent experiments. In Experiment 3, the crosslinker *N,N'*-cystaminebisacrylamide (BAC) was used at 0.1% (w/v) concentration in the final hydrogel instead of *N,N'*-methylenebisacrylamide (BIS). The expansion factor determined from Experiment 3 was not included in determining the average expansion factor (Panel b). Medians and interquartile ranges are shown with whiskers drawn down to the minimum and maximum values. Means  $\pm$  standard deviations are reported.

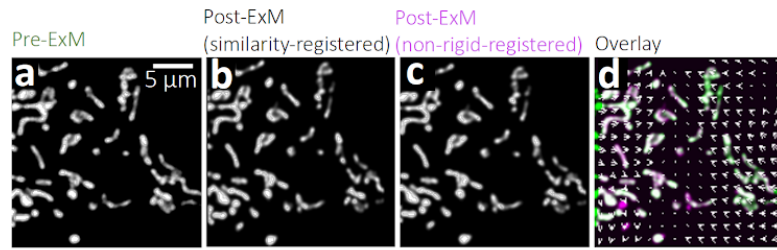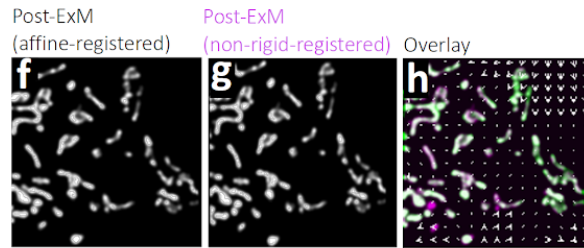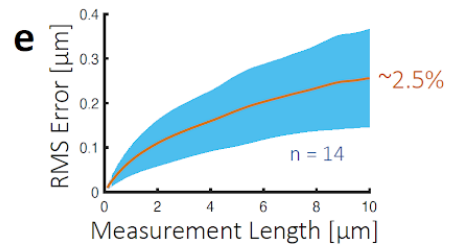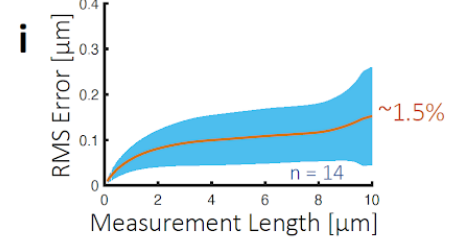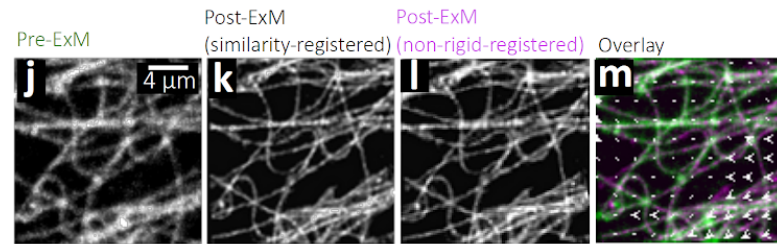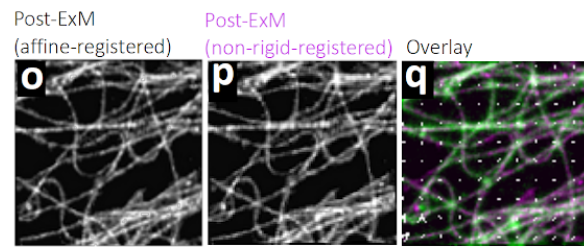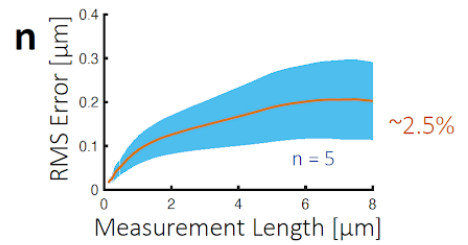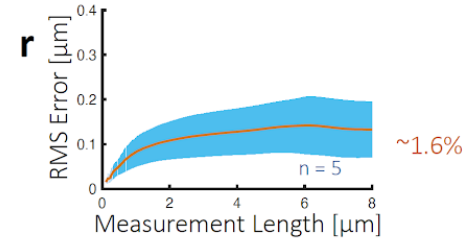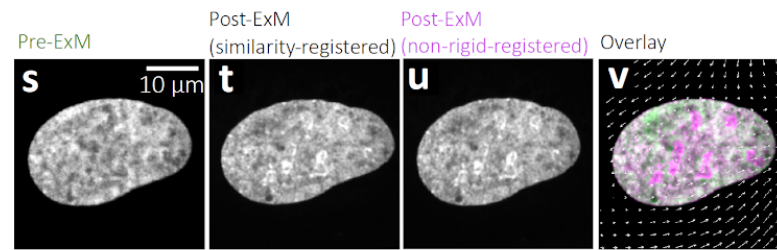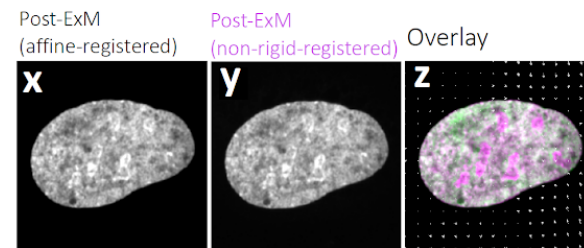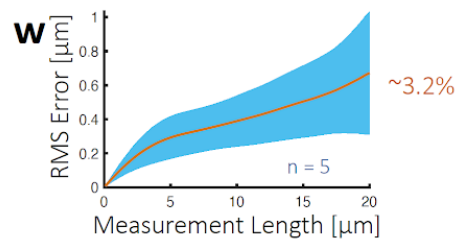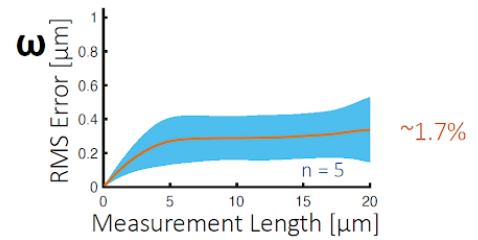

**Supplementary Figure 12. Sample deformation over length scales of several micrometers for mitochondria, microtubules, and cell nuclei. a-i**, evaluation of sample deformation in mitochondria. **a**, pre-expansion image of mitochondria. **b**, post-expansion image of the same field of view similarity-registered to image shown in **a**. **c**, post-expansion image of the same field of view non-rigid-registered to image shown in **a**. **d**, overlay of **b** and **c** with distortion vector field (white arrows). **e**, root-mean square (RMS) error quantification as a function of distance ( $n = 14$  FOVs;  $N = 5$  cells). **f**, post-expansion image of the same field of view affine-registered to image shown in **a**. **g**, post-expansion image of the same field of view non-rigid-registered to image shown in **a**. **h**, overlay of **a** and **g** with distortion vector field (white arrows). **i**, RMS error quantification as a function of distance ( $n = 14$  FOVs;  $N = 5$  cells). **j-r**, evaluation of sample deformation in mitochondria. Layout is analogous to that in **a-i** ( $n = 5$  FOVs;  $N = 4$  cells for both similarity and affine-registered data). **s- $\omega$** , evaluation of sample deformation in nuclei. Layout is analogous to that in **a-i** ( $n = 5$  FOVs;  $N = 5$  cells for both similarity and affine-registered data). Representative images from 14 (**a-d**, **f-h**), 5 (**j-m**, **o-q**), and 5 (**s-v**, **x-z**) fields of view. In the plots **e**, **i**, **n**, **r**, **w**,  **$\omega$** , the orange line corresponds to the mean and blue error bars correspond to the standard deviation. See Methods for RMS error quantification details.

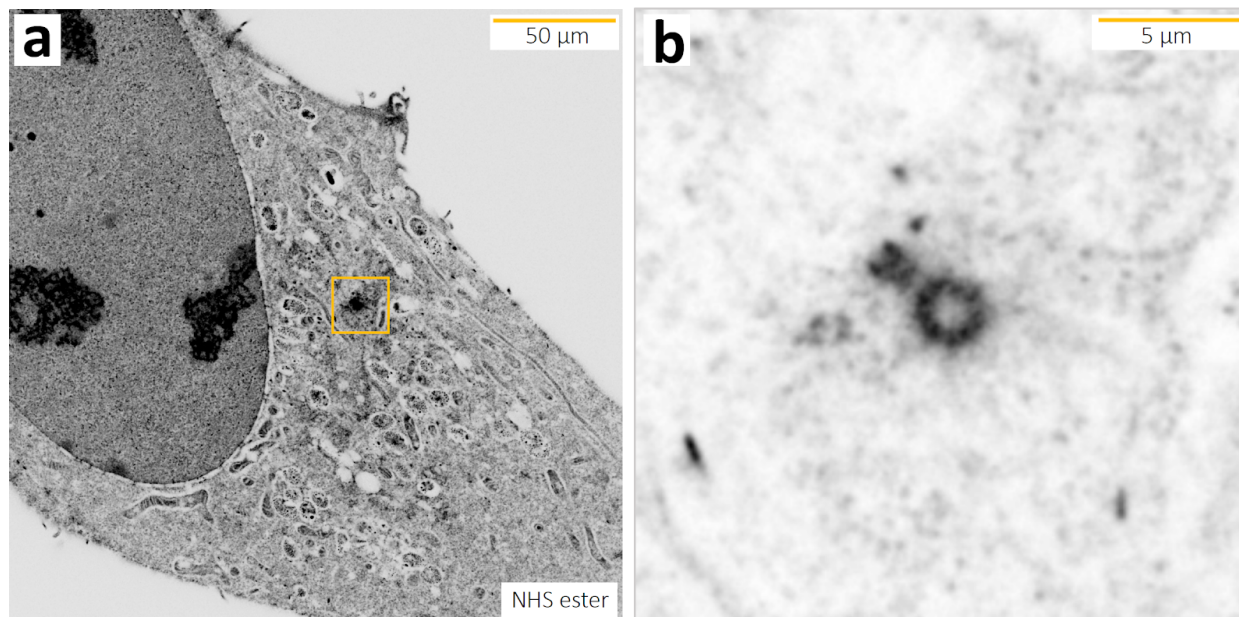

**Supplementary Figure 13. pan-ExM reveals amine-dense centrosomes.** *a*, pan-ExM expanded HeLa cell pan-stained with NHS ester dye and imaged with a standard confocal microscope. *b*, the magnified view of the area shown in the yellow box in *a* reveals the centrosome (adjusted for contrast). Representative images from 4 (*a,b*) independent experiments. The panels are displayed with a white-to-black color table. The yellow scale bars are not corrected for the expansion factor.

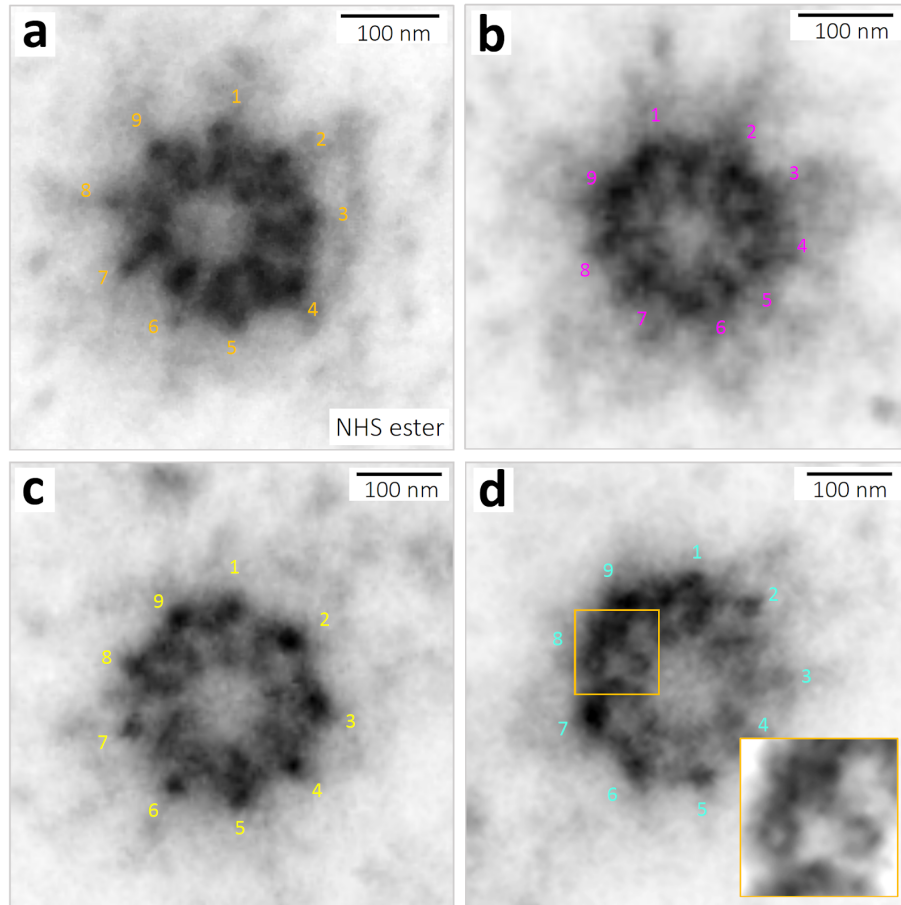

**Supplementary Figure 14. pan-ExM reveals centriole 9-fold symmetry.** *a-d*, Four centrioles processed with pan-ExM and pan-stained with NHS ester dye and imaged with a standard confocal microscope. Numbers denote microtubule triplets. The area in the yellow box in d is shown in inset and reveals rings resembling hollow microtubules within microtubule triplets. Representative images from 4 (a-d) independent experiments. Panels are displayed with a white-to-black color table. Scale bars are corrected for the expansion factor.

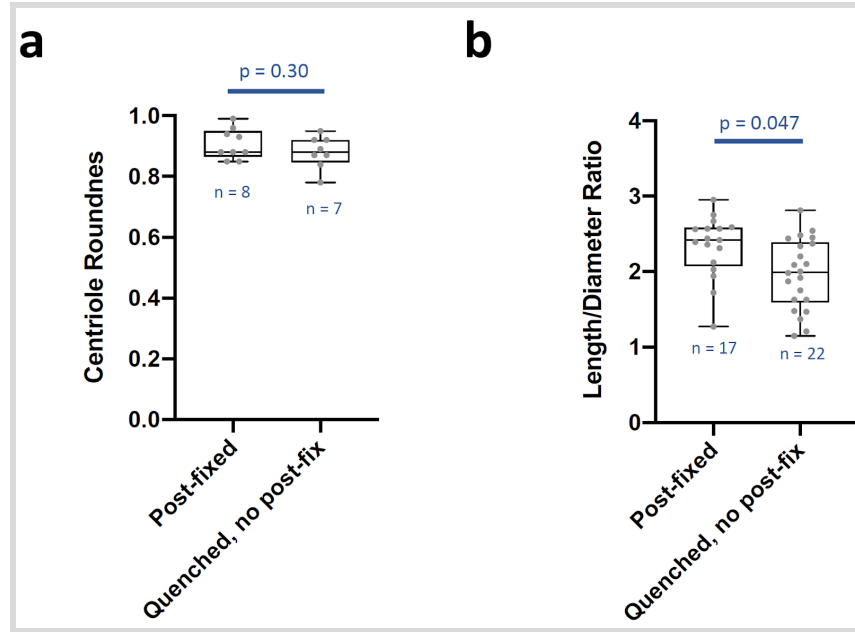

**Supplementary Figure 15. Preventing sample crosslinking after the first expansion does not distort centriole roundedness and only minimally impacts the length-to-diameter ratio.** **a**, roundness measurements of centrioles in U-2OS cells processed with the standard pan-ExM protocol (Post-fixed:  $n = 8$  centrioles) or with the pan-ExM modified protocol (see Methods; Quenched, no post-fix:  $n = 7$  centrioles). **b**, length-to-diameter-ratio measurements of mature centrioles in U-2OS cells processed with the standard pan-ExM protocol (Post-fixed:  $n = 17$  centrioles) or with the pan-ExM modified protocol (see Methods; Quenched, no post-fix:  $n = 22$  centrioles). Medians and interquartile ranges are shown with whiskers drawn down to the minimum and maximum values. Means  $\pm$  standard deviations are reported. An unpaired two-tailed  $t$ -test was used to analyze the data.

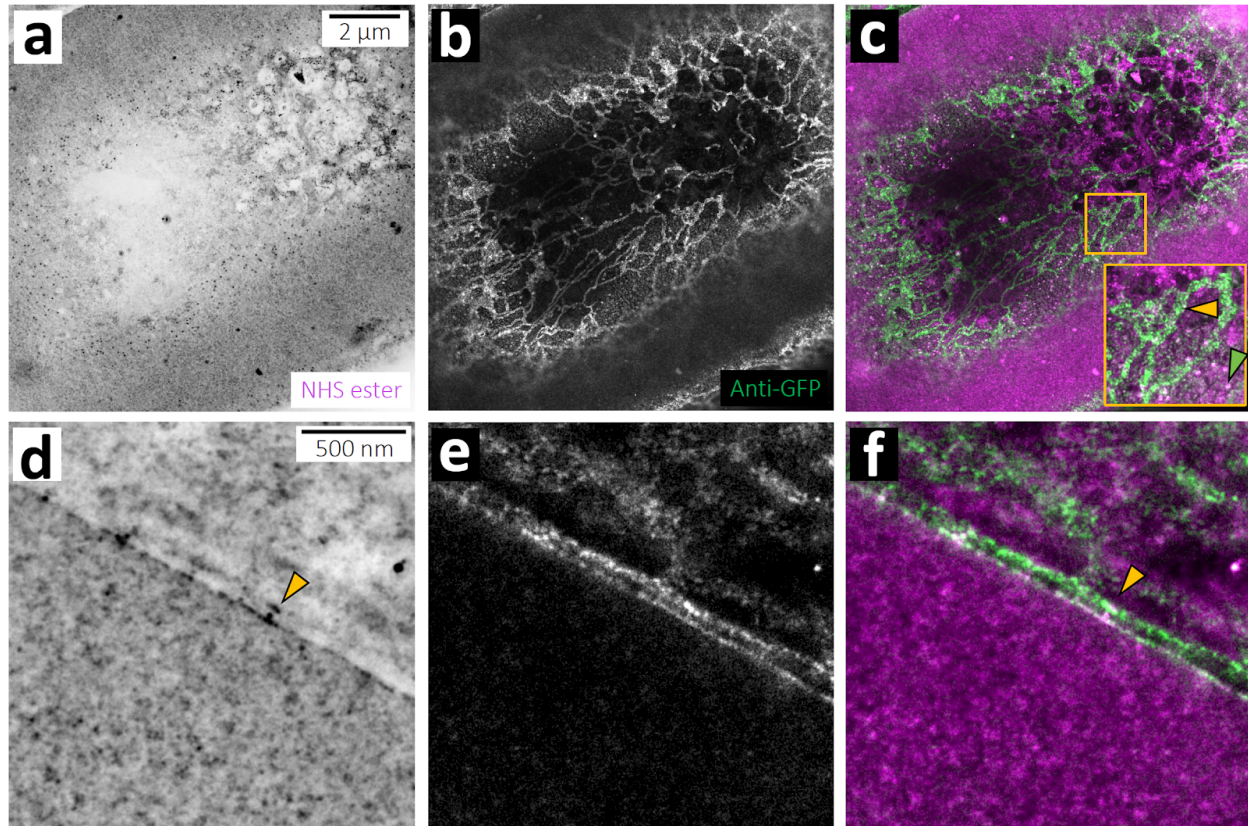

**Supplementary Figure 16. Imaging the ER in the context of cellular ultrastructure.** *a*, NHS ester pan-stained image of a HeLa cell expressing ER-membrane localized Sec61 $\beta$ -GFP, focusing on the bottom of the nucleus. *b*, same area as in *a*, showing anti-GFP immunostaining. *c*, overlay of *a* and *b*. The area in the yellow box is shown in the inset and reveals ER tubules (yellow arrowhead) and nuclear pore complexes (NPCs) (green arrowhead). *d*, NHS ester pan-stained image of a HeLa cell expressing ER-membrane localized Sec61 $\beta$ -GFP, showing the edge of the nucleus. The yellow arrowhead points at a NPC. *e*, same area as in *d*, showing anti-GFP immunostaining which reveals the two membranes of the nuclear envelope. *f*, overlay of *d* and *e*. The yellow arrowhead points at the same NPC as highlighted in *d*, showing that the staining is concentrated between the outer and inner membrane of the nuclear envelope. Representative images from 2 (*a-f*) independent experiments. Panels *a* and *d* are displayed with a white-to-black color table. Panels *b* and *e* are displayed with a black-to-white color table. Scale bars are corrected for the determined expansion factor. The shown images were recorded with a standard confocal microscope.

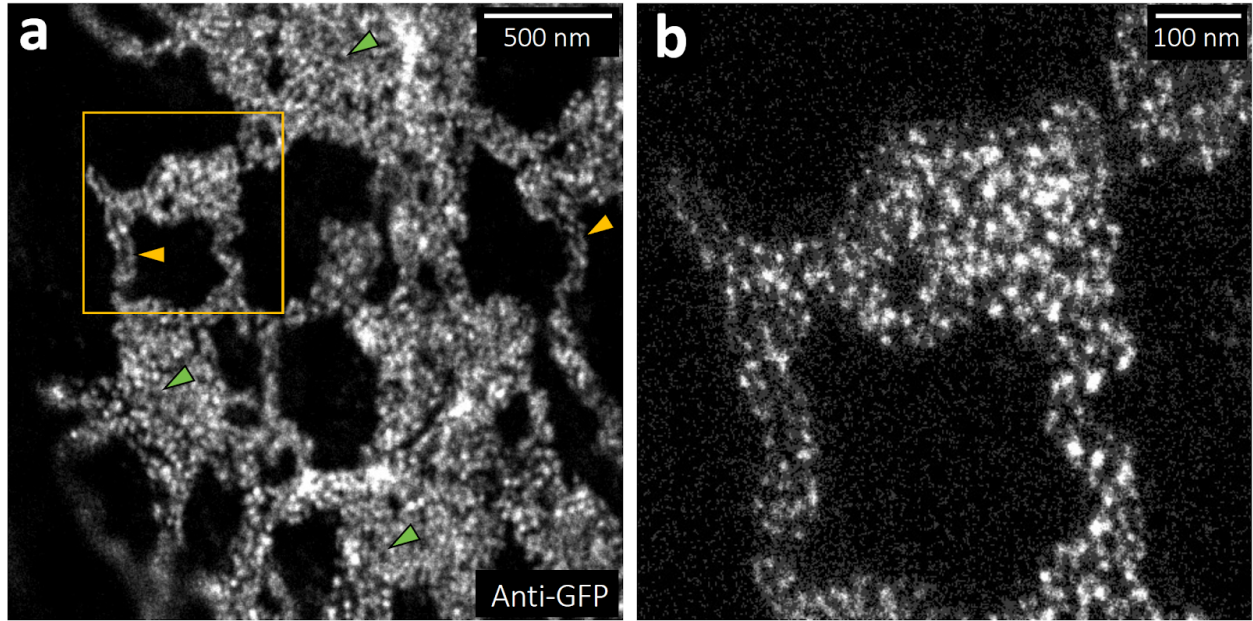

**Supplementary Figure 17. pan-ExM reveals ER architecture.** *a*, Anti-GFP signal in a HeLa cell expressing ER-membrane localized Sec61 $\beta$ -GFP, showing hollow ER tubules (yellow arrowheads) and fenestrated ER sheets (green arrowheads). The image was recorded in standard confocal mode. *b*, STED-super-resolution image of the area outlined by the yellow box in *a* showing clusters of Anti-GFP antibodies. Representative images from 2 (*a*) and 1 (*b*) independent experiments. The figures are displayed with a black-to-white color table. Scale bars are corrected for the determined expansion factor.

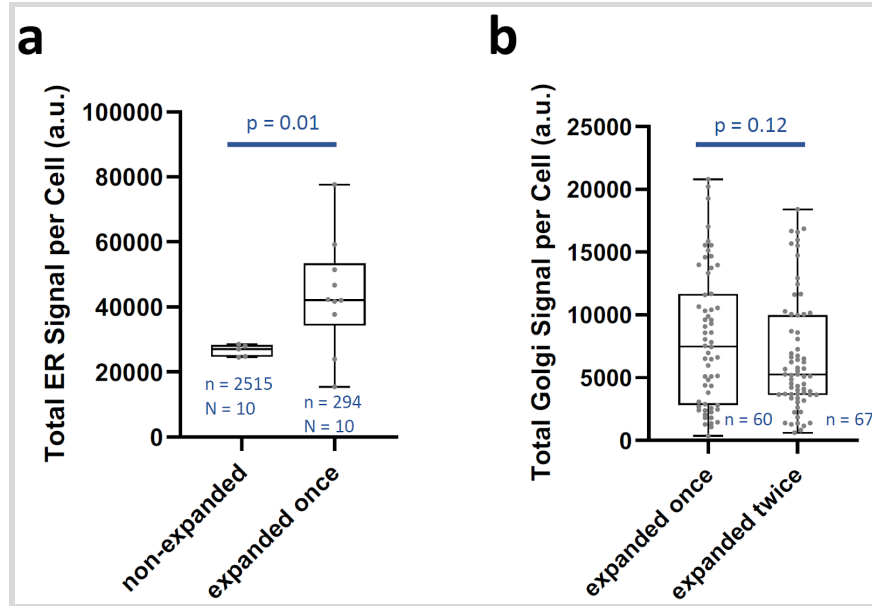

**Supplementary Figure 18. Measurement of protein retention.** **a**, comparison of a non-expanded sample with a sample expanded once. (Non-expanded:  $n = 2515$  cells,  $N = 10$  FOVs; Expanded once:  $n = 294$  cells,  $N = 10$  FOVs.) **b**, comparison of a sample expanded once with a sample expanded twice. (Expanded once:  $n = 60$  cells; Expanded twice:  $n = 67$  cells). For each distribution, median and interquartile range are shown with whiskers drawn down to the minimum and maximum values. Means  $\pm$  standard deviations are reported. An unpaired two-tailed  $t$ -test was used to analyze the data.

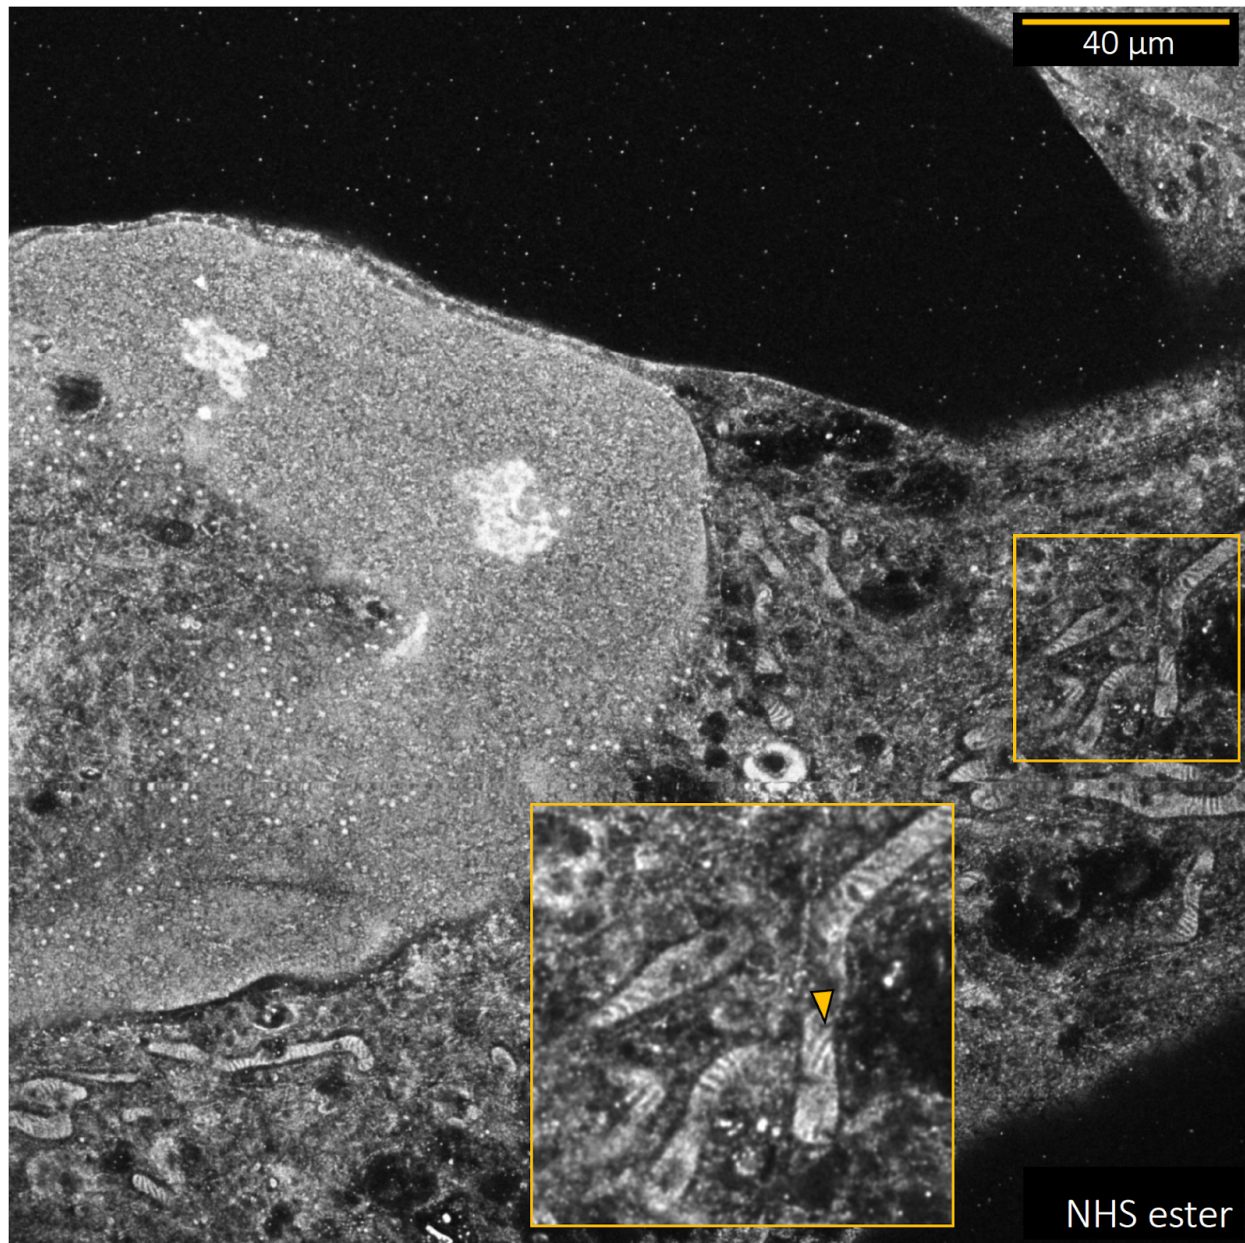

**Supplementary Figure 19. HeLa cell processed with pan-ExM modified protocol (see *Methods*).** The area in the yellow box is shown in the inset and reveals mitochondria cristae. Representative image from 1 independent experiment. The figure is displayed with black-to-white color table. The yellow scale bar is not corrected for the expansion factor. The shown image was recorded with a standard confocal microscope.

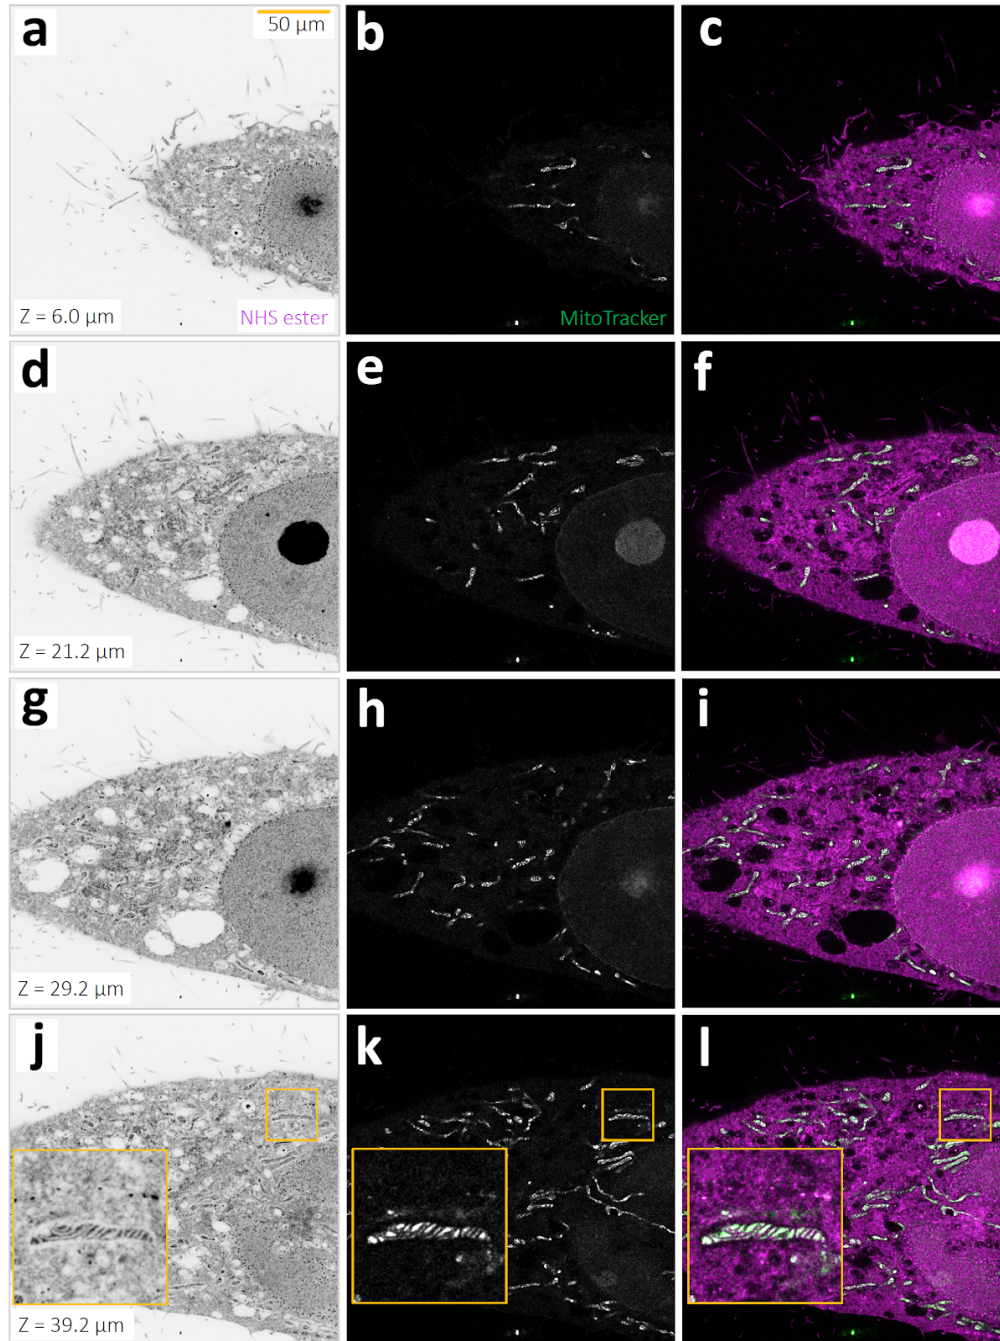

**Supplementary Figure 20. 3D image stack of a HeLa cell pan-stained with NHS ester and labeled with MitoTracker Orange and imaged with a standard confocal microscope.** **a,d,g,j**, NHS ester pan-stained images at axial positions 6.0, 21.2, 29.2 and 39.2  $\mu\text{m}$ , respectively. **b,e,h,k**, MitoTracker Orange staining of the same fields of view. **c,f,i,l**, Overlay of the respective NHS ester and MitoTracker Orange images. The area outlined by the yellow boxes in **j**, **k** and **l** is shown in the insets and reveals mitochondrial cristae in both the NHS ester and MitoTracker Orange channels. Representative images from 5 (**a-l**) independent experiments. Panels **a,b,d,e,g,h,j,k** are displayed with a white-to-black color table. The scale bars and shown axial positions are not corrected for the determined expansion factor.

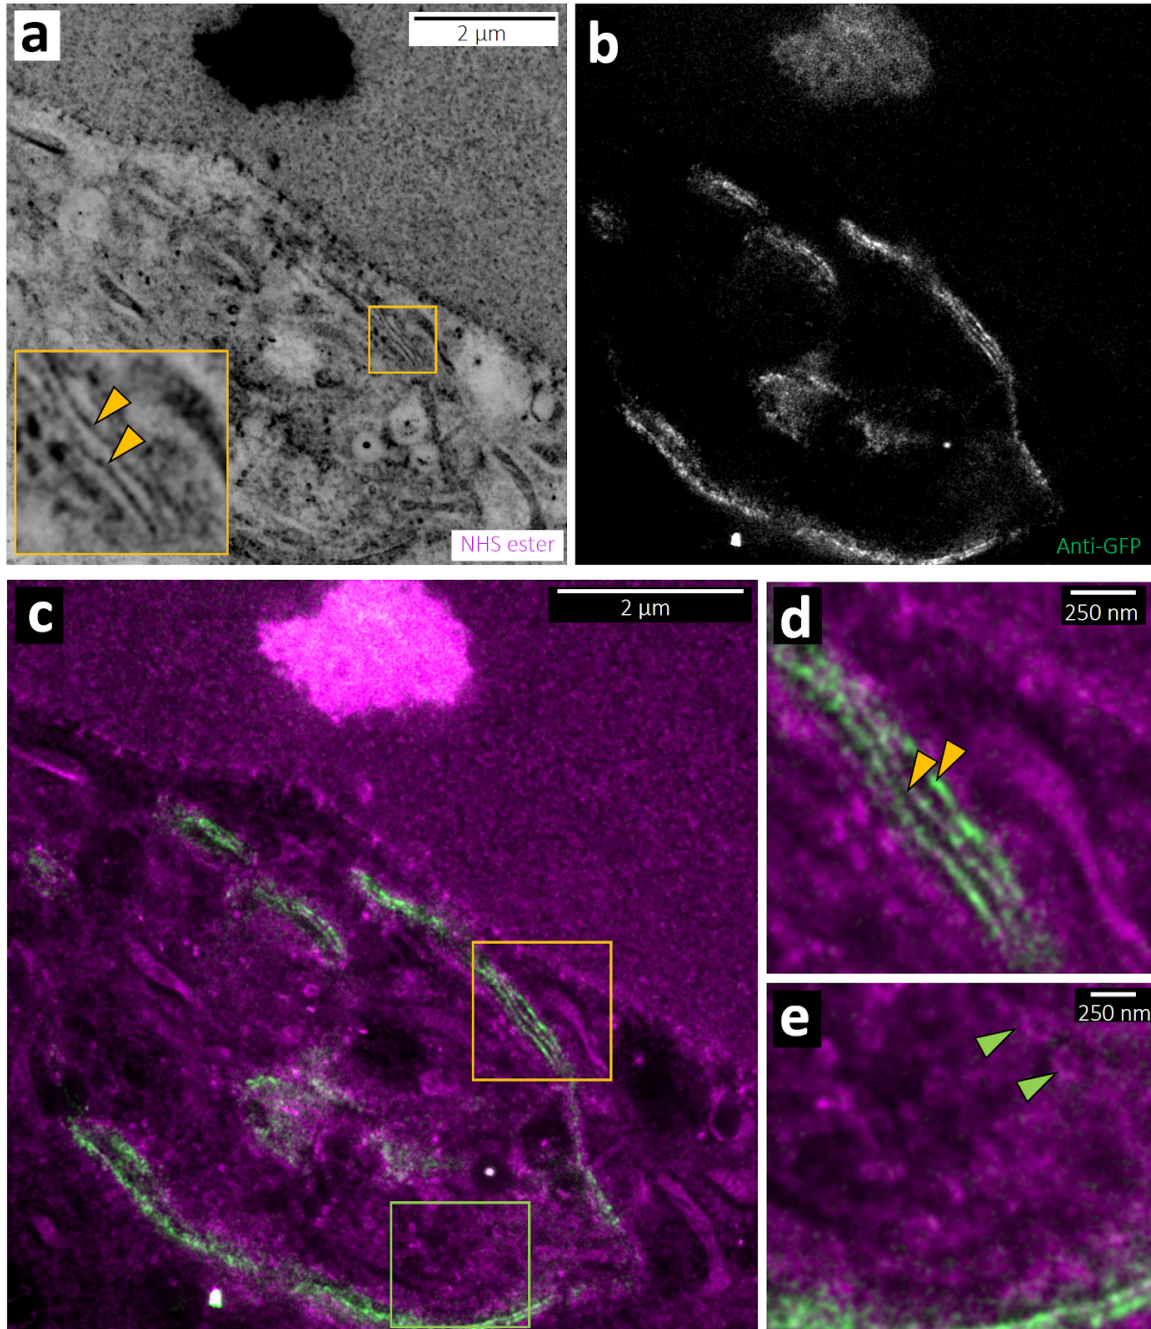

**Supplementary Figure 21: pan-ExM reveals perinuclear Golgi cisternae.** *a*, NHS ester pan-stained HeLa cell expressing Golgi-localized ManII-GFP. *b*, same area as in *a*, showing anti-GFP immunostaining. *c*, overlay of *a* and *b*. *d*, the area shown in the yellow box in *c* showing ManII-positive Golgi cisternae (yellow arrowheads). *e*, the area shown in the green box in *c* showing vesicle-like structures in the vicinity of the Golgi complex (green arrowheads). Representative images from 5 (*a-e*) independent experiments. Panel *a* is displayed with a white-to-black color table. Panel *b* is displayed with a black-to-white color table. Scale bars are corrected for the expansion factor. The shown images were recorded with a standard confocal microscope.

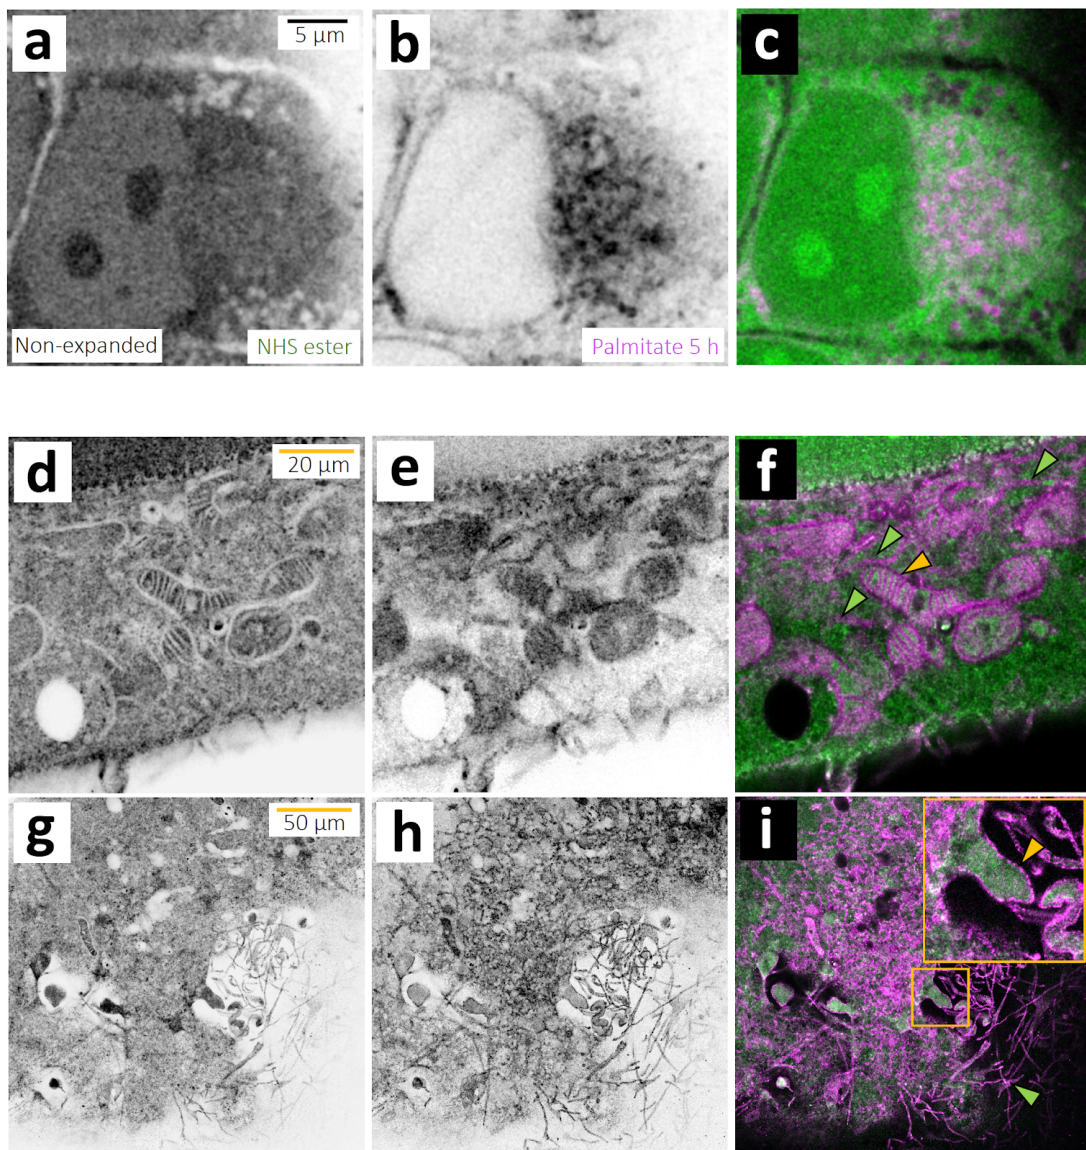

**Supplementary Figure 22. Differential pan-staining reveals compartmentalized palmitate distribution in HeLa cells.** *a*, NHS ester pan-stained non-expanded HeLa cell. *b*, palmitate pan-staining of the same area. *c*, overlay of *a* and *b*. *d*, NHS ester pan-stained image of a pan-ExM expanded HeLa cell, showing the perinuclear cytoplasm. *e*, palmitate pan-staining of the same area. *f*, overlay of *d* and *e*. The yellow arrowhead points at palmitate-rich mitochondria cristae. Green arrowheads point at palmitoylated ER tubules. *g*, NHS ester pan-stained image of a pan-ExM expanded HeLa cell, showing the periphery of the cell. *h*, palmitate pan-staining of the same area. *i*, overlay of *g* and *h*. Representative images from 2 (*a-i*) independent experiments. The area outlined by the yellow box is shown in the inset and reveals a cross-section of the plasma membrane (yellow arrowhead). The green arrowhead points at palmitate-rich filopodia. Panels *a*, *b*, *d*, *e*, *g*, *h* are displayed with a white-to-black color table. Yellow scale bars are not corrected for the expansion factor. The shown images were recorded with a standard confocal microscope.

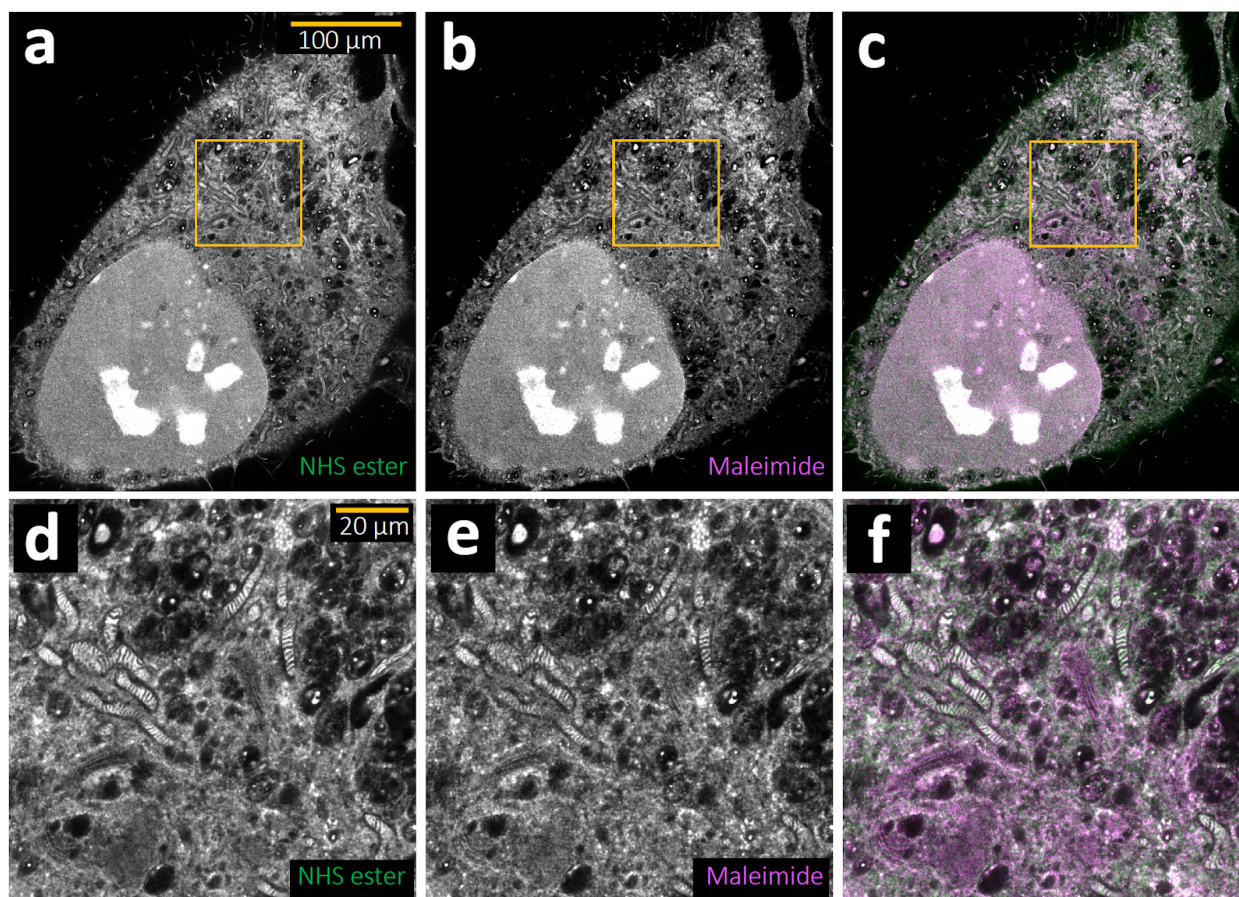

**Supplementary Figure 23. *pan-ExM* reveals cellular ultrastructure in a HeLa cell.** *a*, NHS ester pan-staining channel. *b*, Maleimide pan-staining channel. *c*, overlay of *a* and *b*. *d-f*, the area in the yellow boxes shown in *a-c*, respectively. Representative images from 2 (*a-f*) independent experiments. All panels are displayed with a black-to-white color table. Yellow scale bars are not corrected for the expansion factor. The shown images were recorded with a standard confocal microscope.

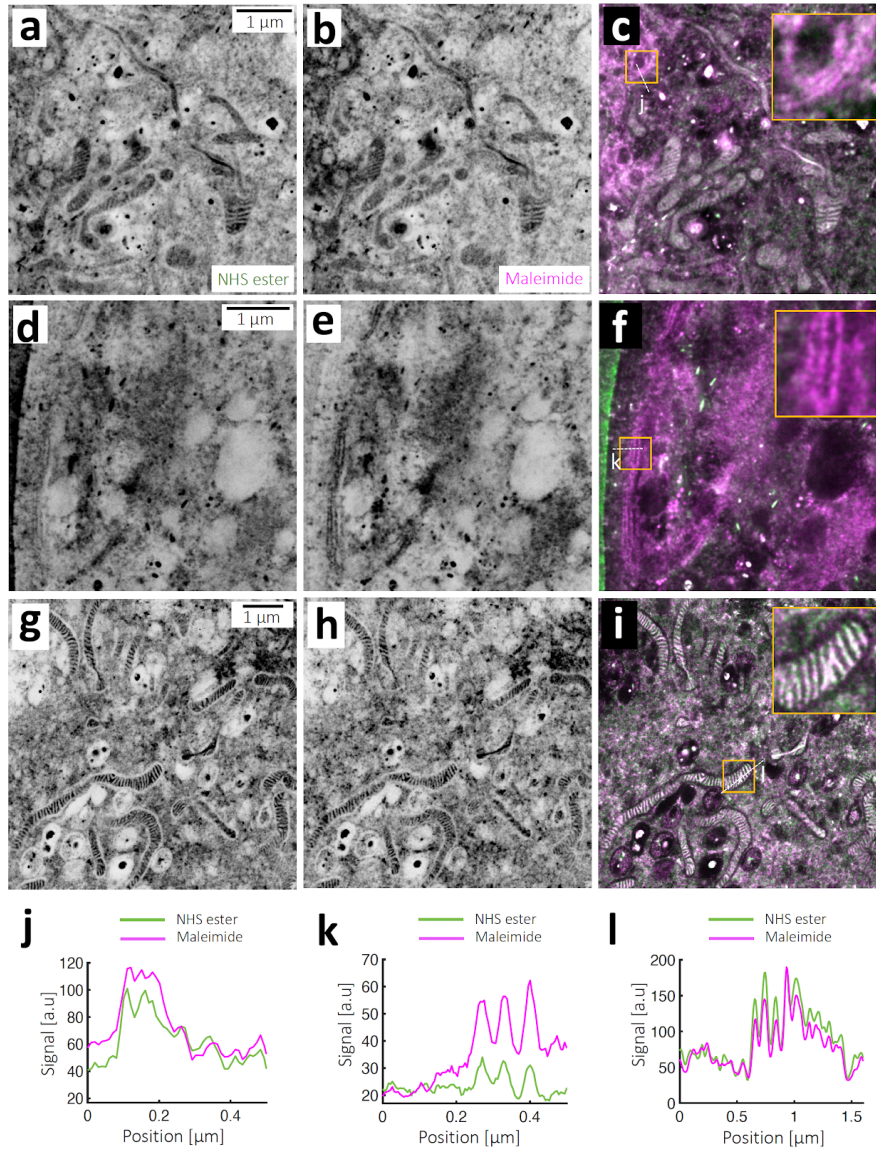

**Supplementary Figure 24. Differential pan-staining reveals the distribution of the cysteine proteome in HeLa cells.** *a*, NHS ester pan-stained HeLa cell. *b*, maleimide channel of the same area. *c*, overlay of *a* and *b*. The area in the yellow box in *c* shows cysteine-enriched Golgi cisternae. *d*, NHS ester pan-stained HeLa cell. *e*, maleimide channel of the same area. *f*, overlay of *d* and *e*. The area in the yellow box in *f* shows cysteine-enriched Golgi cisternae near the nucleus. *g*, NHS ester pan-stained HeLa cell. *h*, Maleimide channel of the same area. *i*, overlay of *g* and *h*. The area in the yellow box in *i* shows mitochondria with a nearly constant lysine to cysteine labeling ratio. Representative images from 2 (*a-i*) independent experiments. *j,k*, line profiles along the dashed lines in *c* and *f* respectively, revealing the change in NHS ester to maleimide staining across the Golgi. *l*, line profile along the dashed lines in *i*, revealing the change in NHS ester to maleimide staining across the cytosol and a mitochondrion. Panels *a,b,d,e,g,h* are displayed with a white-to-black color table. Scale bars are corrected for the expansion factor. The shown images were recorded with a standard confocal microscope.

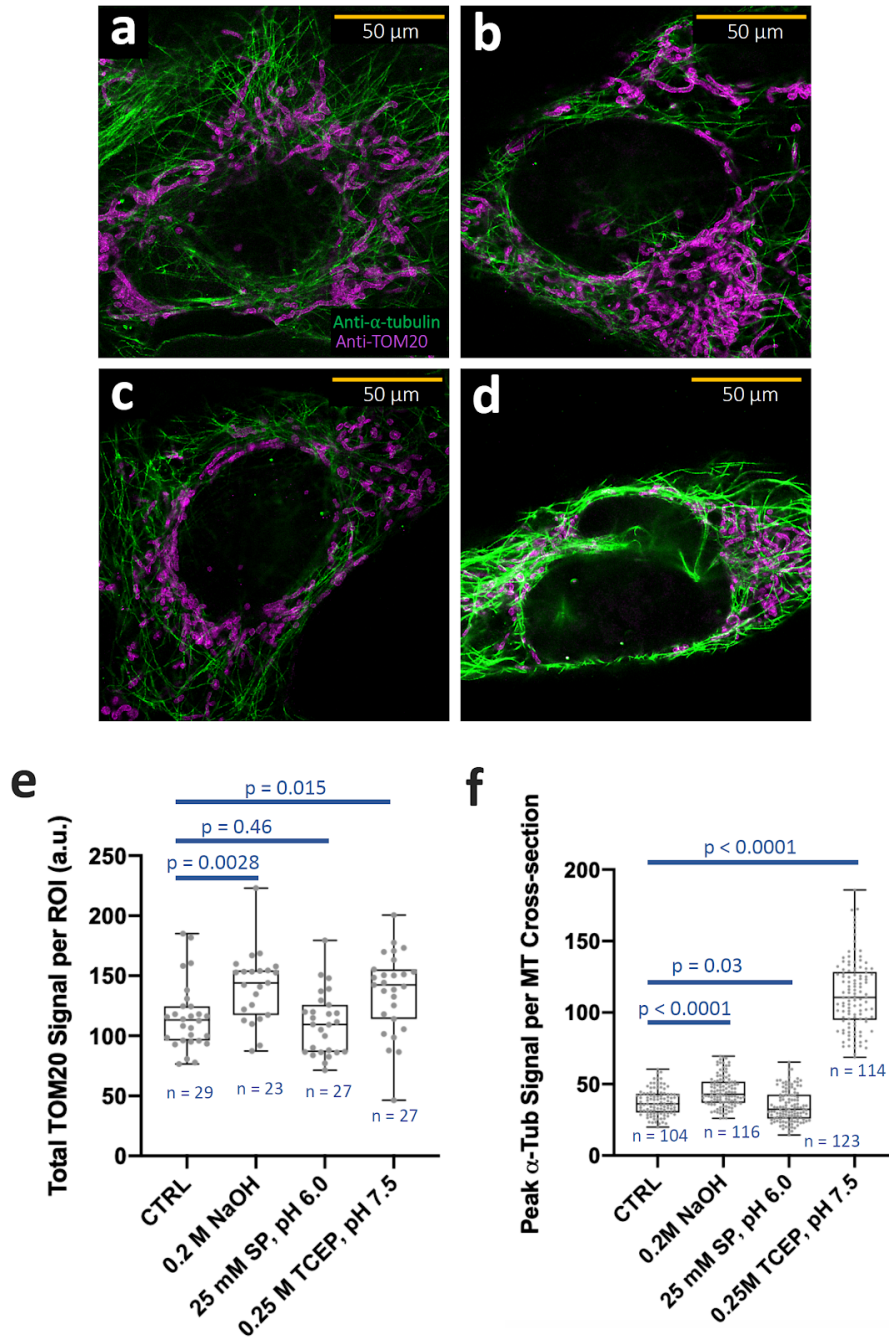

**Supplementary Figure 25. Quantification of antibody labeling efficiency.** Anti-TOM20 and anti- $\alpha$ -tubulin staining in once-expanded *N,N'*-methylenebisacrylamide crosslinked gels: without further treatment after denaturation (CTRL; image shown in **a**); treated with 0.2 M NaOH for 1 hour after denaturation (0.2 M NaOH; image shown in **b**); treated with 25 mM sodium periodate (SP) in 100 mM acetate buffer, pH 6.0 for 1 hour after denaturation (25 mM SP, pH 6.0; image shown in **c**); treated with 0.25 M TCEP in 1 M Tris-Cl buffer, pH 7.5 for 18 hours after denaturation (0.25 M TCEP, pH 7.5; image shown in **d**). Representative images from 5 cells from 1 independent experiment (a-d). **e**, comparison of anti-TOM20 signal for these four conditions (CTRL:  $n = 29$  FOVs,  $N = 5$  cells; 0.2 M NaOH:  $n = 23$  FOVs,  $N = 5$  cells; 25 mM SP,

*pH 6.0: n = 27 FOVs, N = 5 cells; 0.25 M TCEP, pH 7.5: n = 27 FOVs, N = 5 cells). f, comparison anti- $\alpha$ -tubulin signal for the same four conditions (CTRL: n = 104 measurements, N = 5 cells; 0.2 M NaOH: n = 116 measurements, N = 5 cells; 25 mM SP, pH 6.0: n = 123 measurements, N = 5 cells; 0.25 M TCEP, pH 7.5: n = 114 measurements, N = 5 cells). Median and interquartile range are shown with whiskers drawn down to the minimum and maximum values. Means  $\pm$  standard deviations are reported. An unpaired two-tailed t-test was used to compare the mean value of CTRL to the mean of each of the three treatments in e,f. Yellow scale bars are not corrected for the expansion factor.*

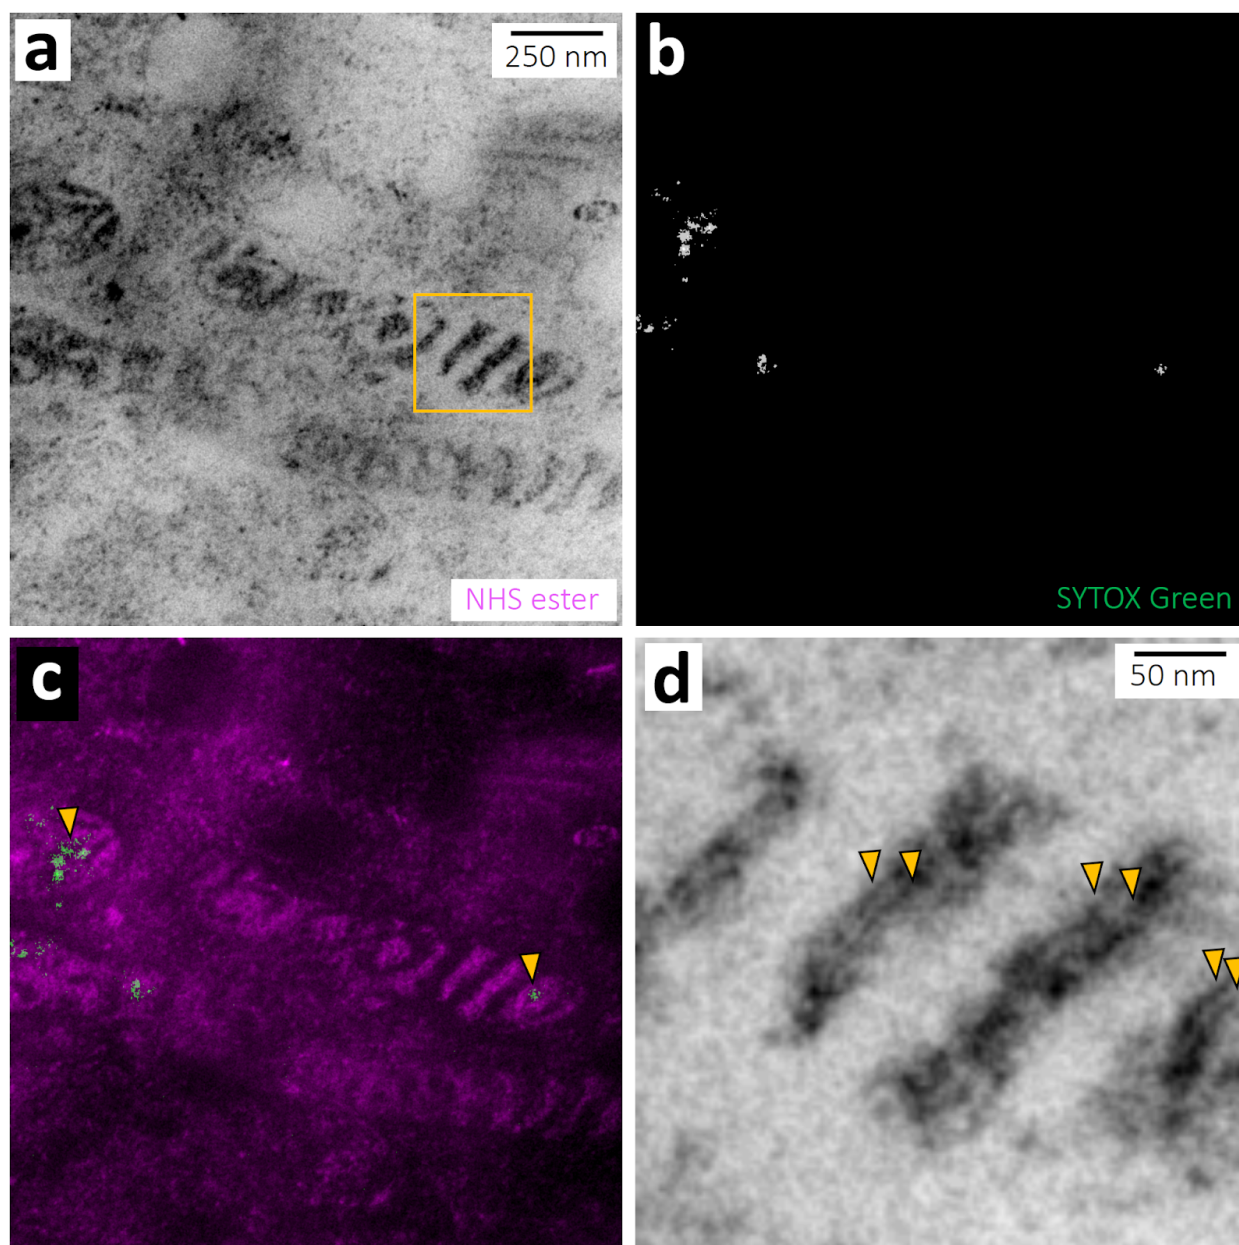

**Supplementary Figure 26. pan-ExM combined with STED microscopy reveals mitochondria ultrastructure.** *a*, NHS ester pan-stained HeLa cell showing mitochondria and imaged with STED super-resolution microscopy. *b*, SYTOX Green staining in same area. *c*, overlay of *a* and *b*. Yellow arrowheads point at mitochondrial DNA (mtDNA) nucleoids. *d*, magnified view of the area in the yellow box in *a* showing amine-rich staining on two sides of mitochondria cristae. Representative images from 2 (*a-d*) independent experiments. Panels *a* and *d* are displayed with a white-to-black color table. Panel *b* is displayed with a black-to-white color table. Scale bars are corrected for the expansion factor.

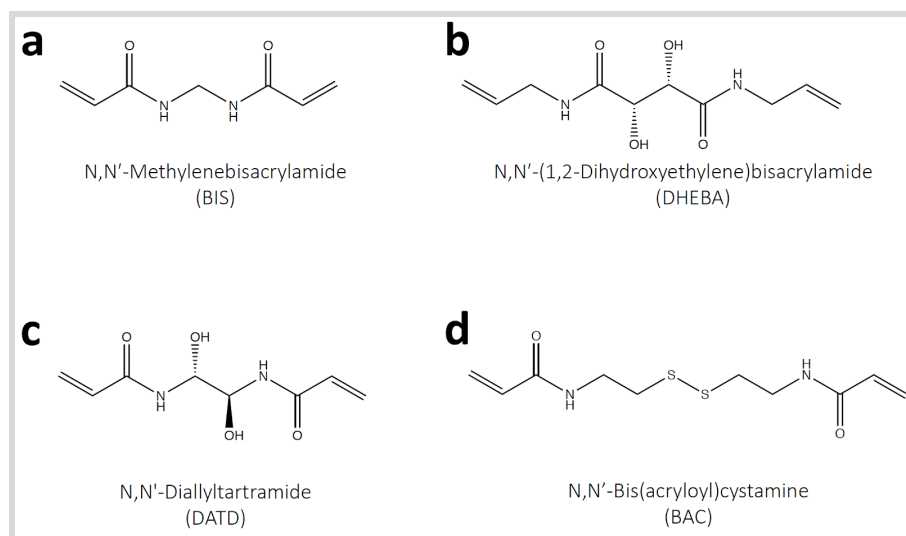

**Supplementary Figure 27. Chemical structures of several commercially available crosslinkers.** **a**, N,N'-Methylenebisacrylamide (BIS), a standard acrylamide crosslinker. **b**, N,N'-(1,2-Dihydroxyethylene)bisacrylamide (DHEBA), a crosslinker whose amidomethylol bonds are readily cleaved with base hydrolysis. **c**, N,N'-Diallyltartramide (DATD), a crosslinker whose diol bond is readily cleaved with periodate. **d**, N,N'-Bis(acryloyl)cystamine (BAC), a crosslinker whose disulfide bond is cleaved with reducing agents.

| Step                      | Reagent                                                        | Acronym            | Storage             | Vendor                       | Catalog number   |
|---------------------------|----------------------------------------------------------------|--------------------|---------------------|------------------------------|------------------|
| Gelations                 | 40% Acrylamide                                                 | AAM                | 4°C                 | Sigma-Aldrich                | A9099            |
|                           | N,N'-(1,2-Dihydroxyethylene)bisacrylamide                      | DHEBA              | RT                  |                              | 294381           |
|                           | Sodium hydroxide                                               | NaOH               | RT                  |                              | S8045            |
|                           | Sodium acrylate                                                | SA                 | -20°C in desiccator | Santa Cruz Biotechnology     | sc-236893C       |
|                           | N,N'-Methylenebis(acrylamide)                                  | BIS                | RT                  | Alfa Aesar                   | J66710           |
|                           | Ammonium persulfate                                            | APS                | RT in desiccator    | American Bio                 | AB00112          |
|                           | N,N,N',N'-Tetramethylethylenediamine                           | TEMED              | RT in desiccator    |                              | AB02020          |
|                           | Tris [hydroxymethyl] aminomethane                              | Tris               | RT                  |                              | AB02000          |
|                           | 20% Sodium dodecyl sulfate solution                            | SDS                | RT                  |                              | AB01922          |
|                           | Sodium chloride                                                | NaCl               | RT                  | J.T. Baker                   | 3624-01          |
|                           | 1x Phosphate buffered saline (Gibco)                           | 1X PBS             | RT                  | Thermofisher                 | 10010023         |
|                           | 10x Phosphate buffered saline (Gibco)                          | 10X PBS            | RT                  |                              | 70011044         |
| Cell culture & fixation   | Potassium hydroxide                                            | KOH                | RT                  | Macron Fine Chemicals        | 6984-04          |
|                           | Fibronectin solution                                           | -                  | 4°C                 | Sigma-Aldrich                | F1141            |
|                           | 16% Paraformaldehyde                                           | FA                 | RT                  | Electron Microscopy Sciences | 15710            |
|                           | 8% Glutaraldehyde                                              | GA                 | 4°C                 |                              | 16019            |
| Pan-staining and labeling | Ca <sup>++</sup> and Mg <sup>++</sup> free HBSS buffer (Gibco) | HBSS               | RT                  | Thermofisher                 | 14170112         |
|                           | SYTOX Green                                                    | -                  | -20°C               |                              | S7020            |
|                           | Click-IT™ Palmitic Acid, Azide                                 | -                  | -20°C               |                              | C10265           |
|                           | MitoTracker Orange CMTMRos (Invitrogen)                        | -                  | -20°C               |                              | M7510            |
|                           | Bovine Serum Albumin                                           | BSA                | 4°C                 | Jackson ImmunoResearch       | 001-000-162      |
|                           | Sodium bicarbonate                                             | NaHCO <sub>3</sub> | RT                  | Sigma-Aldrich                | S5761            |
|                           | Tween 20                                                       | -                  | RT                  |                              | P7949            |
|                           | NHS ester-ATTO594                                              | -                  | -20°C               |                              | 08741            |
|                           | NHS ester-ATTO532                                              | -                  | -20°C               |                              | 88793            |
|                           | Maleimide-ATTO594                                              | -                  | -20°C               |                              | 08717            |
|                           | Tris(2-carboxyethyl)phosphine hydrochloride                    | TCEP               | RT                  |                              | 646547           |
|                           | Alkyne-ATTO590                                                 | -                  | -20°C               |                              | 93990            |
|                           | Fatty acid free Bovine Serum Albumin                           | Delipidated BSA    | 4°C                 |                              | A4612            |
|                           | NHS ester-DY634                                                | -                  | -20°C               | Dyomics                      | 634-01A          |
| Antibodies                | Rabbit polyclonal anti-TOM20                                   | Anti-TOM20         | -20°C               | Abcam                        | ab78547          |
|                           | Rabbit polyclonal anti-GFP (Invitrogen)                        | Anti-GFP           | 4°C                 | Thermofisher                 | A11122           |
|                           | Rabbit polyclonal anti-polyglutamate chain                     | Anti-PolyE         | -20°C               | Adipogen                     | AG-25B-0030-C050 |
|                           | Monoclonal mouse anti-α-tubulin                                | -                  | -20°C               | Sigma-Aldrich                | T6199 or T5168   |
|                           | ATTO647N-conjugated anti-mouse                                 | -                  | -20°C               |                              | 50185            |
|                           | ATTO647N-conjugated anti-rabbit                                | -                  | -20°C               |                              | 40839            |
|                           | ATTO594-conjugated anti-rabbit                                 | -                  | -20°C               |                              | 77671            |

**Supplementary Table 1. Used reagents**

| Materials                                           | Vendor                       | Catalog number |
|-----------------------------------------------------|------------------------------|----------------|
| No. 1.5 12-mm round glass coverslips                | Electron Microscopy Sciences | 72230-01       |
| Glass microscope slide                              | Sigma-Aldrich                | S8400          |
| No. 1.5 22 x 22 mm square cover glass coverslips    | Fisher Scientific            | 12-541BP       |
| No. 1.5 18-mm round coverslip                       | Marienfeld                   | 0117580        |
| 50 mm MatTek dish, No. 1.5 coverslip 30-mm diameter | MatTek Life Sciences         | P50G-1.5-30-F  |
| Picodent Twinsil                                    | Picodent                     | 1300 1000      |

**Supplementary Table 2. Used materials**

|                 |                                                                                                                                                                                                                                                                                                                                                    |
|-----------------|----------------------------------------------------------------------------------------------------------------------------------------------------------------------------------------------------------------------------------------------------------------------------------------------------------------------------------------------------|
| Instruments     | Sonic bath, pH meter, 37°C incubator, nitrogen (or argon) gas tank, dry block incubator, ice bucket, rocker, vortex                                                                                                                                                                                                                                |
| Other materials | Superglue, tweezers, razor blades, container (plastic Tupperware), 24-well plates, 6-well plates, 1.5 mL Eppendorf tubes, 15 mL Eppendorf tubes, 50 mL Eppendorf tubes, Petri dishes, 30-mm dishes, Kim wipes, beaker, stir bar, paintbrush (brush size No. 2 (1.6 mm)), laminated tape, pH strips, 100% ethanol, aluminum foil, surgical scissors |

**Supplementary Table 3. Used instruments, tools and disposables**
